1 **Fndc3a (Fibronectin Domain Containing Protein 3A) influences median fin fold**  
2 **development and caudal fin regeneration in zebrafish by ECM alteration.**

3

4 Daniel Liedtke<sup>1,\*</sup>, Melanie Orth<sup>1</sup>, Michelle Meissler<sup>1</sup>, Sinje Geuer<sup>2</sup>, Sabine Knaup<sup>1</sup>, Isabell  
5 Köblitz<sup>1,3</sup>, Eva Klopocki<sup>1</sup>

6

7 <sup>1</sup> Institute of Human Genetics, Biocenter, University of Würzburg, 97074 Würzburg, Germany

8 <sup>2</sup> Department of Human Genetics, Donders Institute for Brain, Cognition and Behaviour,  
9 Radboud University Medical Center, 6500 HB Nijmegen, The Netherlands

10 <sup>3</sup> Department of Cell and Developmental Biology, Biocenter, University of Würzburg, 97074  
11 Würzburg, Germany

12

13 \* Corresponding author: Daniel Liedtke

14 Institut für Humangenetik,  
15 Biozentrum, Am Hubland  
16 Julius-Maximilians Universität Würzburg  
17 D-97074 Würzburg  
18 Tel.: +49-931-31-81350  
19 Fax.: +49-931-31-81350-0  
20 E-mail address: [liedtke@biozentrum.uni-wuerzburg.de](mailto:liedtke@biozentrum.uni-wuerzburg.de)

## 1 **Keywords (max. 6)**

2 median fin fold, caudal fin regeneration, epidermal cells, zebrafish, CRISPR/Cas9, ECM

3

## 4 **Summary statement**

5 We investigated potential functions of Fndc3a during caudal fin development and  
6 regeneration in zebrafish. Reduced function interferes with correct epidermal cells structure  
7 and implies a role during vertebrate extremity development.

8

## 9 **Abstract**

10 Inherited genetic alterations are often found to be disease-causing factors of patient  
11 phenotypes. To unravel the molecular consequences of newly identified factors functional  
12 investigations *in vivo* are eminent. We investigated molecular functions of FNDC3A  
13 (Fibronectin Domain Containing Protein 3A; HUGO), a novel candidate gene for split-  
14 hand/foot malformations (SHFM) in humans, by utilizing zebrafish (*Danio rerio*) as a  
15 vertebrate model. Patients with congenital SHFM display prominent limb malformations,  
16 which are caused by disturbance of limb development due to defects in apical ectodermal  
17 ridge (AER) establishment and maintenance. Initial gene expression and protein localization  
18 studies clarified the presence of *fndc3a* in developing and regenerating fins of zebrafish. For  
19 functional studies we established a hypomorphic *fndc3a* mutant line (*fndc3a<sup>wue1/wue1</sup>*) via  
20 CRISPR/Cas9, exhibiting phenotypic malformations and changed gene expression patterns  
21 during early stages of median fin fold development. Furthermore, *fndc3a<sup>wue1/wue1</sup>* mutants  
22 display abnormal collagen localization, actinotrichia breakup and cellular defects in epidermal  
23 cells during caudal fin development. The observed effects are only temporary and later result  
24 in rather normal fin development in adults. In accordance with early fin development, proper  
25 caudal fin regeneration in adult *fndc3a<sup>wue1/wue1</sup>* mutants is hampered by interference with  
26 actinotrichia formation and epidermal cell abnormalities. Investigation of cellular matrix  
27 formation implied that loss of ECM structure is a common cause for both phenotypes. Our  
28 results thereby provide a molecular link between Fndc3a function during both developmental  
29 processes in zebrafish and foreshadow Fndc3a as a novel temporal regulator of epidermal  
30 cell properties during extremity development in vertebrates.

## 1 Introduction

2 Patients suffering from SHFM display prominent limb malformations, lacking the central  
3 autopod rays, resulting in syndactyly, aplasia and/or hypoplasia of the phalanges,  
4 metacarpals and metatarsals, and median clefts of hands and feet (Duijf et al., 2003;  
5 Gurrieri and Everman, 2013). Several genetic loci and causes have been associated with this  
6 inherited disease, for example mutations in *TP63* (OMIM \*603273), *DLX5* (OMIM \*600028)  
7 or *DLX6* (OMIM \*600030). A large number of animal experiments and cell culture studies  
8 further clarified the underlying genetic network, but still unresolved patient cases disclose the  
9 necessity to identify novel contributing molecular factors.

10 We identified *FNDC3A* as a new potential candidate gene in pathogenesis of human non-  
11 syndromic SHFM by exome sequencing of a consanguineous family from Syria with four  
12 affected individuals (unpublished data). *FNDC3A* consists of up to nine fibronectin type III  
13 domains, which are a common feature of a large number of extracellular proteins acting by  
14 modulation of different signaling pathways (Cheng et al., 2013; Zhu and Clark, 2014).  
15 *FNDC3A* has initially been described to be overexpressed in human odontoblasts (Carrouel  
16 et al., 2008). Functional experiments in *Symplastic spermatids (sys)* knockout mice indicated  
17 that *FNDC3A* is essential for cell adhesion between spermatids and Sertoli cells, resulting in  
18 sterile males (Obholz et al., 2006). Besides these two studies the developmental function of  
19 *FNDC3A* is still unknown and no association to extremity development or regeneration has  
20 been described yet. The purpose of this study was to investigate potential functions of  
21 *Fndc3a* during extremity development and regeneration in zebrafish.

22 Differences between tetrapod limb and fin development in ray-finned fishes (Actinopterygii)  
23 are obvious in anatomy and structure, but both are homologous appendages and thought to  
24 share common genetic features (Yano and Tamura, 2013). Also the development of pectoral  
25 fins in fish species is assumed to closely resemble extremity development in higher  
26 vertebrates, by sharing common molecular signals arising from a structure called the apical  
27 ectodermal ridge (AER) (Amaral and Schneider, 2017; Yano et al., 2012). Only recently  
28 differences between fin and limb AER have been reported and hint at a fin specific cellular  
29 process in fish species (Masselink et al., 2016; Yano et al., 2012). Even more eminent are  
30 developmental differences between paired fins (pectoral fins) and unpaired fins (caudal, anal  
31 and dorsal fins), as the establishment of the is achieved by evolutionary more distant  
32 processes (van den Boogaart et al., 2012). All unpaired fins arise from a common  
33 developmental precursor structure during larval stages called the median fin fold, which is  
34 exclusively found in larval teleosts. A wide number of molecular processes and distinct genes  
35 have been identified by several genetic screens in zebrafish revealing a complex network of  
36 factors necessary for correct median fin fold development (Carney et al., 2010; van Eeden et

1 al., 1996). More than 30 years ago changes of epidermal cell shape and modulation of the  
2 extracellular matrix (ECM) have been described as one of the essential factors for correct  
3 median fin fold and caudal fin morphogenesis in zebrafish (Dane and Tucker, 1985). Later,  
4 signals from the WNT signaling pathway have been shown to be crucial for regulation of  
5 epithelial cell morphology by modulating laminin levels and thereby orchestrating correct  
6 patterning in growing fins (Nagendran et al., 2015). These early cellular steps of caudal fin  
7 development are prerequisites for subsequent processes; i.e. mesoderm cell migration, cell  
8 differentiation and normal fin growth. After initiation and pattern formation within the fin fold,  
9 further tissue differentiation results in the development of cartilage and bone, as skeletal  
10 elements in the later fin, and the gradual resorption of the median fin fold during juvenile  
11 stages (Parichy et al., 2009). Fin rays are formed by the assembly of actinotrichia and  
12 lepidotrichia in the ECM of epidermal cells (Grandel and Schulte-Merker, 1998; Zhang et al.,  
13 2010). While lepidotrichia are segmented and calcified bone rays, actinotrichia are non-  
14 calcified collagen fibers. Two collagens are essential for actinotrichia formation during fin  
15 development: Col2a1 and Col1a1 (Duran et al., 2011). In addition to the collagens actinodin  
16 proteins, encoded by the *and1* and *and2* genes, have been identified to be essential for  
17 actinotrichia formation (Zhang et al., 2010). During development actinotrichia fibers are  
18 normally formed at the fin tips, depicting characteristic brush-shaped structures.

19 Fin regeneration is a developmental process in adult fish sharing a number of conserved  
20 molecular mechanisms with extremity development at earlier stages of development (Iovine,  
21 2007; Wehner and Weidinger, 2015). For both processes correct epidermal cell function,  
22 epithelial cell structure, and actinotrichia fibers are essential to correctly build all skeletal and  
23 mesenchymal fin elements (Mari-Beffa et al., 1989; Pfefferli and Jazwinska, 2015). Additional  
24 structural factors, especially ECM proteins like integrins and laminins, have been implied in  
25 regulating Wnt signaling during regeneration and in correct assembly of the teleost fin  
26 (Carney et al., 2010; Nagendran et al., 2015; Webb et al., 2007). Although a large number of  
27 involved “molecular players” have been described to date, not all factors necessary for  
28 correct ECM assembly in the regenerating caudal fin have been identified yet. We propose  
29 Fndc3a as a novel player in both fin development and regeneration.

## 1 Results

2 The *FNDC3A* orthologous gene in zebrafish, *fndc3a*, is located on zebrafish chromosome 15  
3 (ENSEMBL Zv9: 3,066,162-3,114,443 reverse strand; ENSDARG00000067569; ZFIN ID:  
4 ZDB-GENE-030131-7015) and encodes in 29 exons for a transcript of 3501 bp. The  
5 corresponding zebrafish 1166aa Fndc3a protein (ENSDART00000097261) consists of 4  
6 transmembrane domains and 9 fibronectin type III domains. Two different predicted transcript  
7 variants have recently been reported for *fndc3a* (GenBank: XM\_021466300.1,  
8 XM\_021466301), encoding for proteins of 1247 and 1217aa. Both transcript variants are  
9 highly similar and differ only in a 30aa stretch at the N-terminus.

10 Phylogenetic and syntenic analyses showed that the *FNDC3A* gene is highly conserved  
11 throughout vertebrate evolution and orthologues are not duplicated in ray-finned fish species  
12 (data not shown). Amino acid alignments resulted in an up to 57% amino acid identity with  
13 95% coverage, indicating a high level of conservation between human and zebrafish  
14 proteins. Two *fndc3a* paralogues can be identified in the zebrafish genome: *fndc3ba*  
15 (chromosome 2; ENSDARG00000078179; ZFIN ID: ZDB-GENE-070510-1) and *fndc3bb*  
16 (chromosome 24; ENSDARG00000062023; ZFIN ID: ZDB-GENE-070510-2). Both genes  
17 share highest sequence similarities with *FNDC3B* genes in other species and are dedicated  
18 in genomic analyses to an evolutionary distinct group when compared to *FNDC3* genes. All  
19 three gene family members have not been functionally investigated in zebrafish yet.

20

### 21 Expression of *fndc3a* during early zebrafish development.

22 To resolve the spatiotemporal expression of *fndc3a* during zebrafish development, we  
23 performed RNA in-situ hybridization experiments. *fndc3a* transcripts were detected spatially  
24 restricted to the tail bud region and the ventral fin fold mesenchyme from 14hpf onwards (hpf  
25 = hours post-fertilization; Fig. 1). Expression of *fndc3a* at later stages of embryonic  
26 development is mainly present in distinct brain regions; e.g. mid-hindbrain boundary,  
27 rhombencephalon, and mesencephalon; as well as in pectoral fins, in the notochord, in  
28 somites and in the caudal median fin fold (Fig. 1A and Fig. S8A). Restricted expression in the  
29 developing tail bud region at later stages (>16hpf) could be observed in the median fin fold,  
30 in Kupffer's vesicle, and in cells of the chordo neural hinge region by longer staining times  
31 (Fig. 1B).

32 >Fig. 1

33 Detection of Fndc3a protein localization was performed via immunofluorescence by  
34 application of a human FNDC3A antibody. This experiment showed similar regional

1 localization of *Fndc3a* in Kupffer's vesicle, the median fin fold region, and the caudal  
2 neuronal hinge during different stages of embryonic development consistent with RNA in-situ  
3 hybridization (24hpf: Fig. 1C and 48hpf: Fig.1D). The two most noticeable differences  
4 between RNA and protein localization were a spotted pattern of *Fndc3a* in notochord cells  
5 and in chevron shaped stripes between somite boundaries (higher magnification images in  
6 Fig.1C). Moreover this experiment clarified the cellular localization of *Fndc3a* at the cell  
7 membrane of epidermal cells during early stages of median fin fold development (higher  
8 magnification images Fig. 1C and D).

9

#### 10 **Generation of *fndc3a*<sup>wue1/wue1</sup> mutants.**

11 To investigate consequences of *fndc3a* loss in zebrafish, we established a *fndc3a*<sup>wue1/wue1</sup>  
12 mutant line via the CRISPR/Cas9 system (Hwang et al., 2013; Jao et al., 2013). sgRNAs  
13 were designed to target the evolutionary highly conserved third fibronectin III domain of  
14 *Fndc3a* (Fig. 2A), as incomplete genome information about the 5' end of *fndc3a* at the  
15 initiation of the project prevented the identification of a distinct start codon for sRNA  
16 targeting. For further analyses a zebrafish line with a 5bp substitution leading to a premature  
17 Stop codon in exon 13 (Zv9: ENSDARE00000690608) of *fndc3a* was chosen (*fndc3a*<sup>wue1</sup> line;  
18 ZFIN ID: ZDB-ALT-170417-3; Fig. S1A). The alteration was validated by sequencing of  
19 genomic DNA and cDNA (Fig. 2A; Fig. S1C) and could be detected continuously in  
20 subsequent inbred generations (data not shown). Off-site targets of the used *fndc3a* sgRNA  
21 were computationally predicted and investigated by sequencing the three most likely  
22 potential off-target sites. No off-site sequence alterations were detected in *fndc3a*<sup>wue1/+</sup> or  
23 *fndc3a*<sup>wue1/wue1</sup> mutants (Fig. S1B).

24 >Fig. 2

25 >Fig. S1

26

#### 27 **Phenotypic investigation and validation of *fndc3a*<sup>wue1/wue1</sup> mutants.**

28 Initial visual investigation of *fndc3a*<sup>wue1/wue1</sup> mutants indicated a tail bud and median fin fold  
29 phenotype in homozygous embryos (Fig. 2B-D). A first indication of changed fin development  
30 could be observed 20-22hpf, as a number of *fndc3a*<sup>wue1/wue1</sup> embryos showed straightened  
31 tail buds and reduced ventral fin fold structures (47%, n=40; arrow in Fig.2B). During  
32 subsequent stages of embryonic development *fndc3a*<sup>wue1/wue1</sup> mutant embryos developed  
33 kinked tails (27%, n= 100; 48hpf; Fig. 2C) and caudal fin fold malformations (22%, n= 41;  
34 120hpf; arrows in Fig. 2D). The observed fin malformations in 120hpf embryos are sites of

1 actinotrichia aggregation and show accumulation of apoptotic cells at this position (Fig. S2).  
2 Further assessment of temperature sensitivity of the *fndc3a*<sup>wue1/wue1</sup> phenotype revealed that  
3 raised temperatures result in an increased number and severity of the caudal fin phenotype  
4 (32°C incubation: 60%, n= 85; 28°C incubation: 48%, n= 40; 20°C incubation: 18%, n= 28;  
5 Fig. S3).

6 >Fig. S2

7 >Fig. S3

8 Besides the observed early median fin fold effects, *fndc3a*<sup>wue1/wue1</sup> juvenile and adult  
9 individuals in general showed normal development and behavior. The generated  
10 *fndc3a*<sup>wue1/wue1</sup> lines did not show reduction of fertility rates, which could have been suspected  
11 from published mouse knock-out lines (*Fndc3a*<sup>Gt(RRP208)Byg</sup> or *Fndc3a*<sup>sys</sup>; Mouse Genome  
12 Database (MGD) at the Mouse Genome Informatics website, The Jackson Laboratory, Bar  
13 Harbor, Maine. <http://www.informatics.jax.org>; Obholz et al., 2006). Although, in  
14 approximately 30% of adult homozygous *fndc3a*<sup>wue1/wue1</sup> fish alterations of the caudal fin  
15 shape and the posterior body part could be visually detected (n=21/71). The observed  
16 phenotype ranged from minor fin shape changes in the majority of affected fish, up to axis  
17 shortening and stronger caudal fin deformations (Fig. 2E). We did not observe changes in  
18 phenotype severity or appearance rates in subsequent, homozygous generations, excluding  
19 a potential stronger maternal zygotic effect in *fndc3a*<sup>wue1/wue1</sup> or mitigation of the phenotype.  
20 The observation of variable adult phenotypes, incomplete phenotypic penetrance and  
21 temperature sensitivity of the embryonic phenotype led us to the assumption that  
22 *fndc3a*<sup>wue1/wue1</sup> mutants are hypomorphic. Further investigations of the *fndc3a*<sup>wue1/wue1</sup> mutant  
23 line via qPCR were performed to investigate potential nonsense mediated decay of *fndc3a*  
24 mRNAs. We quantified *fndc3a* mRNA expression in three independent embryo groups with  
25 two independent primer pairs (Fig. 2F; primer sequences are given in Table S1). Relative to  
26 *AB* controls *fndc3a* transcripts in *fndc3a*<sup>wue1/+</sup> and *fndc3a*<sup>wue1/wue1</sup> mutants were reduced to  
27 approximately 60% in heterozygotes and correspondingly to 30% relative expression in  
28 homozygotes. This experiment showed a reduction, but not a complete loss, of *fndc3a*  
29 mRNA in the *fndc3a*<sup>wue1/wue1</sup> mutants and thereby implies a potential residual function of  
30 Fndc3a in these mutants.

31

32 To achieve a full loss-of-function *fndc3a* phenotype two sgRNAs targeting exon 13 and 18  
33 were designed and simultaneously used, resulting in a potential larger intragenic deletion or  
34 the introduction of several sequence alterations in the *fndc3a* locus. The corresponding  
35 transient phenotype indicated a more severe tail fin malformations in these fish (n=12/32)  
36 when compared to *fndc3a*<sup>wue1/wue1</sup> mutants (Fig. S4). Phenotypically the observed tail

1 malformation defects showed strong caudal fin reduction and tail curling, similar to *smad5*  
2 (*somitabun* or *piggytail*) (Mullins, 1996 #124; Hild, 1999 #123) or *bmp1a* zebrafish mutants  
3 (*frilly fins*) (Asharani et al., 2012). The double *fndc3a* CRISPR phenotype could not be  
4 maintained and next generation crossings did not result in a stable line, indicating, similar to  
5 *Symplastic spermatids* (*sys*) mice constricted fertility after complete loss or stronger  
6 reduction of *Fndc3a* function. However, this transient experiment supported our observations  
7 of the *fndc3a<sup>wue1/wue1</sup>* mutant and indicated a noticeable influence of *Fndc3a* function on  
8 caudal fin development.

9

10 >Fig. S4

11

## 12 **Reduction of *Fndc3a* function results in median fin fold defects.**

13 To elucidate the molecular causes underlying the early changes in caudal fin development of  
14 *fndc3a<sup>wue1/wue1</sup>* mutants we analyzed expression patterns of different, well established  
15 markers, expressed in the median fin fold tissues (Fig. 3). Expression of *fras1* is observed in  
16 the apical region of median fin fold (Carney et al., 2010; Gautier et al., 2008; Talbot et al.,  
17 2012). *hmcn1* expression is present in the epithelial cells of the apical fin fold, while  
18 expression of *hmcn2* can be detected in the fin fold epithelium and the fin mesenchyme  
19 (Carney et al., 2010; Feitosa et al., 2012). *bmp1a* expression is described in osteoblasts, fin  
20 mesenchyme cells, floor plate and hypochord cells (Asharani et al., 2012; Jasuja et al.,  
21 2006). *fbln1* is detected in presomitic mesoderm cells and in the dorsal neural rod (Feitosa et  
22 al., 2012; Zhang et al., 1997). In *fndc3a<sup>wue1/wue1</sup>* mutants expression of *fras1* and *hmcn1* were  
23 still present in the dorsal fin apical region 20 to 22hpf, but lost in the ventral region between  
24 Kupffer's vesicle and the tail bud tip (number of affected *fndc3a<sup>wue1/wue1</sup>* embryos: *fras1*: 9/32;  
25 *hmcn1*: 11/26; Fig. 3A). Vice versa, expression patterns of *hmcn2*, *bmp1a*, and *fbln1* in this  
26 region were slightly changed and transverse sections indicated that ventral fin fold structures  
27 were lost (number of affected *fndc3a<sup>wue1/wue1</sup>* embryos: *hmcn2*: 24/43; *bmp1a*: 22/45; *fbln1*:  
28 16/32). Expression of these three genes in the presomitic mesoderm was present in  
29 *fndc3a<sup>wue1/wue1</sup>* mutants but indicated convergence or even fusion of somites at ventral  
30 positions (indicated by arrows in Fig. 3A). The affected regions in the mutants correlated to  
31 the regions of *fndc3a* expression during the investigated stages (Fig. 1). Investigation of  
32 further mesodermal markers in *fndc3a<sup>wue1/wue1</sup>* mutants at this developmental stage  
33 additionally confirmed misplaced *myod* expression in ventral positions and indicated changes  
34 in chordo neural hinge cells by reduced *shha*, *ta(ntl)*, and *fgf8* expression (number of affected  
35 *fndc3a<sup>wue1/wue1</sup>* embryos: *myoD*: 12/22; *shha*: 7/17; *ta(ntl)*: 5/13; *fgf8a*: 5/13; Fig. S5), hinting  
36 at a structural or steric effect on tail development after *Fndc3a* reduction at this stage of



1 development.

2

3 Analyses in 48hpf mutant embryos showed reduced expression of *fras1* in *fndc3a*<sup>wue1/wue1</sup>  
4 mutants, but a slight increase of *hmnc2*, *bmp1a* and *fbln1* expressing cells in the posterior fin  
5 tip (number of affected *fndc3a*<sup>wue1/wue1</sup> embryos: *fras1*: 10/24; *hmnc2*: 12/25; *bmp1a*: 8/21;  
6 *fbln1*: 9/24; Fig. 3B). In the same set of embryos expressional changes of *fras1*, *hmnc2*, and  
7 *fbln1* in the ventral fin fold, posterior to the proctodeum were less evident, and indicated only  
8 a slight reduction of *fras1* expression and a slightly broader *hmnc2* expression (Fig. 3C).  
9 Similar to the investigated markers the ventral expression domain of *and1*, an essential  
10 factor for actinotrichia formation (Duran et al., 2011), was also different in 22hpf  
11 *fndc3a*<sup>wue1/wue1</sup> embryos (number of affected *fndc3a*<sup>wue1/wue1</sup> embryos: 12/25; Fig. 3D). *and1*  
12 expression was recovered in fin folds of 48hpf embryos, but seemed to be slightly weaker in  
13 comparison to controls (control n=16; weaker expression in *fndc3a*<sup>wue1/wue1</sup> embryos  
14 n=10/18). In general, the gene expression analyses indicate that *fndc3a*<sup>wue1/wue1</sup> embryos  
15 started to recover normal gene expression patterns in median fin fold cells and developed  
16 only temporal defects during early median fin fold development. Most prominently apical cells  
17 of the median fin fold were influenced by reduced levels of Fndc3a during the first 2 days of  
18 zebrafish development.

19 >Fig. 3

20 >Fig. S5

### 21 **Morpholino knockdown and rescue experiments support specific role of Fndc3a in** 22 **median fin fold development.**

23 Validation of *fndc3a*<sup>wue1/wue1</sup> knockdown specific effects on median fin fold development in  
24 mutants was done by Morpholino knockdown and rescue experiments (Fig. S6 and S7).  
25 Phenotypic investigation of *fndc3a* morphants further clarified, that similar to *fndc3a*<sup>wue1/wue1</sup>  
26 mutant embryos, median fin fold malformations were induced in a dosage dependent manner  
27 in the first 48h of development (*AB* control embryos with tail phenotype 24hpf injected with  
28 0.1mM *fndc3a* MO: 0/35; 0.25mM *fndc3a* MO: 17/96; 0.5mM *fndc3a* MO: 29/56; control:  
29 2/348; Fig. S6B and C). Notably, injection of *fndc3a* Morpholino into *fndc3a*<sup>wue1/wue1</sup> embryos  
30 resulted in an enhanced number of embryos showing tail phenotypes and supports the  
31 hypothesis of a hypomorphic mutation (*fndc3a*<sup>wue1/wue1</sup> embryos with tail phenotype 24hpf  
32 injected with 0.1mM *fndc3a* MO: 12/36; 0.25mM *fndc3a* MO: 42/81; 0.5mM *fndc3a* MO:  
33 17/18 with high mortality rates; control: 51/207; Fig. S6B and C). Loss of median fin fold  
34 markers *fras1* and *hmnc1* and changes in *hmnc2* expression in ventral fin folds were  
35 observed in *fndc3a* morphants and further confirm the observations in *fndc3a*<sup>wue1/wue1</sup> mutants

1 (summarized altered marker gene expression in control: 0/57; *fndc3a*<sup>wue1/wue1</sup>: 30/58; 0.25nM  
2 *fndc3a* MO injection in AB: 14/28; *fndc3a* 0.25nM MO injection in *fndc3a*<sup>wue1/wue1</sup>: 12/12; Fig.  
3 S6D).

4 >Fig. S6

5 Rescue and overexpression experiments were performed by injection of full-length human  
6 *FNDC3A* RNA (Fig. S7). These experiments indicated a rescue of the tail phenotype in  
7 *fndc3a*<sup>wue1/wue1</sup> mutants after moderate RNA supplementation (tail phenotype in uninjected  
8 *fndc3a*<sup>wue1/wue1</sup>: 51/207; *fndc3a*<sup>wue1/wue1</sup> rescue with 25ng/μl *FNDC3A* RNA: 9/107;  
9 *fndc3a*<sup>wue1/wue1</sup> rescue with 50ng/μl *FNDC3A* RNA: 64/94; Fig. S7A and B). In addition, regain  
10 of *fras1* and *hmcn1* and *hmcn2* marker gene expression was detected in ventral median fin  
11 folds of rescued embryos (summarized altered marker gene expression in control: 0/20;  
12 *fndc3a*<sup>wue1/wue1</sup>: 25/55; *fndc3a*<sup>wue1/wue1</sup> rescue with 25 mg/μl *FNDC3A* RNA: 4/80; Fig. S7C).  
13 Injection of *FNDC3A* RNA into AB control embryos did rarely result in tail malformations (tail  
14 phenotype in control: 2/345; 25ng/μl *FNDC3A* RNA: 4/36; 50ng/μl *FNDC3A* RNA: 7/93; Fig.  
15 S7B). These experiments indicate a narrow threshold level for Fndc3a to fulfill its function in  
16 early median fin fold cells and support the observed *fndc3a*<sup>wue1/wue1</sup> phenotype.

17 >Fig. S7

18

### 19 ***fndc3a*<sup>wue1/wue1</sup> mutants show actinotrichia breakdown and basal epidermal cell defects.**

20 Our observations in homozygous mutants and in morphants implied a transient function of  
21 Fndc3a during early median fin fold development resulting in caudal fin malformation at later  
22 stages of development. Localization of *fndc3a* mRNA expression and Fndc3a protein during  
23 these stages further suggests that the observed effects are directly or indirectly linked to  
24 epidermal cells or associated structures. To clarify this question and to investigate structural  
25 defects causing the observed developmental phenotype we at first investigated actinotrichia  
26 formation in *fndc3a*<sup>wue1/wue1</sup> mutants.

27 Actinotrichia are a fish-specific structural element consisting of collagen fibers (Col1a1 and  
28 Col2a1) and actinodin proteins (Duran et al., 2011; Zhang et al., 2010). Characteristically  
29 transverse striation of actinotrichia can be observed in several fish species via electron  
30 microscopy and suggests that these fibers are giant collagen fibrils of hyperpolymerized  
31 collagen (Montes et al., 1982). Actinotrichia were visualized in *fndc3a*<sup>wue1/wue1</sup> mutants either  
32 by differential interference contrast (DIC) microscopy (Fig. 4A) or by immunofluorescent  
33 staining of Col2a, a structural component of actinotrichia ((Duran et al., 2011); Fig. 4B).  
34 Actinotrichia fibers in *fndc3a*<sup>wue1/wue1</sup> mutants were still present, but displayed obvious  
35 structural alterations and signs of breakdown in the ventral caudal fin (control: 0/10;

1 *fndc3a*<sup>wue1/wue1</sup>: 7/12). While control fish at 52hpf showed radiant symmetrical arrangement of  
2 Col2a in the actinotrichia fibers of the developing caudal fin, *fndc3a*<sup>wue1/wue1</sup> embryos partly  
3 lack these structures and depicted unstructured, crumbled collagen fibers in the fin  
4 mesenchyme (control: 0/7; *fndc3a*<sup>wue1/wue1</sup>:12/14) . High levels of remaining Col2a in  
5 *fndc3a*<sup>wue1/wue1</sup> mutants could be detected in apical cells at the fin border (arrows in Fig.4B),  
6 which were also visible as distinct cells in the DIC microscopy (Fig. 4A).

7 >Fig. 4

8 Potential cellular reasons for actinotrichia breakdown and Col2 misallocation in the median  
9 fin fold can be numerous. Based on the expression timing of *fndc3a* during median fin fold  
10 development and Fndc3a localization we assumed that epidermal cells might be influenced  
11 by reduced function of Fndc3a and that the normal cellular organization in the developing fin  
12 is lost (Dane and Tucker, 1985; Duran et al., 2011). To assess the potential effects of *fndc3a*  
13 mutation on epidermal cells during median fin fold development we performed staining for  
14 TP63 in *fndc3a*<sup>wue1/wue1</sup> mutants (Lee and Kimelman, 2002) (Fig. 4C). In 22-24hpf embryos  
15 epidermal cells of *fndc3a*<sup>wue1/wue1</sup> mutants showed lack of ventral fin fold structures and  
16 reduced median fin fold width at this position (arrows in Fig. 4C9; quantification in Fig. 4D).  
17 Along with this observation, a reduced number of epidermal cells could be detected at this  
18 stage in the ventral fin fold. At 48hpf *fndc3a*<sup>wue1/wue1</sup> mutants developed outgrowing ventral  
19 median folds. Although these were still shorter in length they did not display a significant  
20 lower number of epidermal cells in comparison to control embryos (Fig. 4D10 and D11;  
21 quantification in Fig. 4E), indicating cellular recovery of the median fin fold structure.  
22 Additionally, *fndc3a*<sup>wue1/wue1</sup> mutants displayed aggregation of epidermal cells at the fin fold  
23 border, which were not observed in control embryos (Fig. 4D12).

24 To further clarify the cellular consequences of Fndc3a reduction in epidermal cells of the  
25 median fin fold, we performed Transmission Electron Microscopy (TEM). Control or  
26 *fndc3a*<sup>wue1/+</sup> embryos showed normal arrangement of anatomical fin structures: the outer  
27 epithelial layer (oel), the basal epidermal layer (bel), the basal membrane (bm), and  
28 actinotrichia (a) in dorsal and ventral trunk fin folds (Fig. 4F). Actinotrichia fibers are normally  
29 attached to the basal membrane and display prominent stratification (van den Boogaart et  
30 al., 2012). *fndc3a*<sup>wue1/wue1</sup> mutant embryos showed an almost complete loss of actinotrichia in  
31 ventral fin folds, while in dorsal fin folds of the same individuals actinotrichia were only  
32 slightly reduced but still present (lower row Fig. 4F). Small remains of actinotrichia, showing  
33 characteristic stratification, were present in ventral fin folds (arrows Fig. 4F). But also  
34 misplaced collagen fibers not attached to the basal membrane could be detected (circles Fig.  
35 4F). The ventral median fin fold of *fndc3a*<sup>wue1/wue1</sup> mutants displayed the presence of  
36 mesenchymal cells, the outer and basal epidermal cell layer (Fig. 4F). But the sub-cellular

1 structure of the basal epidermal layer was altered. It exhibited cavities between the outer and  
2 basal epidermal layers (marked by arrow heads) and displayed changes in the ECM  
3 surrounding these cells. This observation strongly implies that the disruption of actinotrichia  
4 fibers and the observed effects on TP63 positive cells after *Fndc3a* reduction are due to  
5 cellular defects in the basal epidermal cell layer.

6 Contemporaneous to the caudal median fin fold, pectoral fins are formed during embryonic  
7 development and share common structural components and genetic factors with caudal fins  
8 (Iovine, 2007). RNA in-situ hybridization and immunofluorescence indicated *fndc3a*  
9 expression and localization during the first days of embryonic development in epidermal cells  
10 of pectoral fins (Fig. 1; Fig. S8A). A potential effect of *fndc3a* reduction on pectoral fin  
11 development was investigated by phenotypic observation (Fig. S8B) and *Col2a* as well as  
12 TP63 immunofluorescence staining (Fig. S8C). These experiments indicated no alterations in  
13 pectoral fin development in *fndc3a<sup>wue1/wue1</sup>* during embryogenesis. Likewise adult  
14 *fndc3a<sup>wue1/wue1</sup>* mutants and transient double *fndc3a* CRISPR injected fish did not show  
15 changed pectoral fin morphology (data not shown) and indicated no or only a minor role of  
16 *Fndc3a* in pectoral fin development.

17 >Fig. S8

18

### 19 **Fin regeneration is only temporally influenced in *fndc3a<sup>wue1/wue1</sup>* mutants.**

20 Besides their function during fin development, actinotrichia and epidermal cells possess  
21 essential roles during the regeneration of adult caudal fins after amputation (Duran et al.,  
22 2011; Santamaria and Becerra, 1991). Similar to their role in fin development *Col2a* and  
23 *Col1a* were identified to be necessary factors of actinotrichia formation during this process  
24 (Duran et al., 2015), implying comparable cellular processes during fin development and  
25 regeneration. We therefore hypothesized that reduction of *Fndc3a* function might also  
26 interfere with actinotrichia formation and basal epidermal cells during fin regeneration.

27 >Fig. S9

28 >Fig. S10

29 To test this hypothesis, we performed regeneration experiments on adult caudal fins with  
30 control and *fndc3a<sup>wue1/wue1</sup>* fish (Fig. 5 and Fig. S9). Two remarkable observations were made:  
31 First, regenerates looked opaque, disorganized and tubercular extensions attached to the  
32 epidermal layer of the fin regenerates were eminent between 4dpa and 6dpa (days post  
33 amputation) in *fndc3a<sup>wue1/wue1</sup>* mutants (arrowheads in Fig. 5A; Fig. S9B and D; abnormal  
34 regenerate phenotypes 6dpa: control: 3/19; *fndc3a<sup>wue1/wue1</sup>*: 13/19). Subsequent histological

1 investigation via H&E staining on sections of these regenerates confirmed detached or  
2 loosely attached cells in the outer epidermal layer of the *fndc3a*<sup>wue1/wue1</sup> regenerates. These  
3 cells were additionally investigated by immunofluorescence and depicted high levels of Col2a  
4 at the regenerative front (arrows in Fig. 5B). TEM analysis further clarified that these cells  
5 were still attached to the epidermal cell layer and incorporate electronic dense material in  
6 their Golgi apparatus and in intracellular vesicles (Fig. 5E). In accordance with this  
7 observation, *fndc3a* expression in fin regenerates could be detected in the distal wound  
8 blastema at 4dpa and 6dpa (Fig. S9C). Localization of Fndc3a protein in regenerates was  
9 confirmed by immunofluorescence in the epidermal cell layers of regenerates (Fig. 5C).  
10 Second, actinotrichia fibers at the tip of 4dpa regenerates looked disorganized and clumped  
11 in *fndc3a*<sup>wue1/wue1</sup> mutants (arrows in Fig. 5A). In 4dpa regenerates of control individuals TEM  
12 analysis of formed actinotrichia fibers showed bundles of stratified actin fibers in close  
13 proximity to the basal membrane cells (Fig.5F). In contrast, *fndc3a*<sup>wue1/wue1</sup> mutants lack these  
14 prominent compact actinotrichia fibers and only depicted loose filaments adjacent to the  
15 membrane layer. Subsequent investigation of epidermal cells by TP63 staining in  
16 regenerates 4dpa showed interference with normal regenerate structure and disturbance of  
17 epidermal cells in *fndc3a*<sup>wue1/wue1</sup> mutant regenerates (Fig. 5D). This indicates altered  
18 epidermal organization as a potential reason for the observed effects in regenerates after  
19 reduced Fndc3a function, similar to the processes observed in the median fin fold during  
20 early development.

21 >Fig.5

22 Similar to the temperature dependency of the hypomorphic *fndc3a*<sup>wue1/wue1</sup> phenotype during  
23 fin development, the observed effects during fin regeneration could be enhanced by keeping  
24 fish at a raised temperature of 32°C during the phase of regeneration (incubation at 24°C in  
25 Fig. S9A and B; incubation at 32°C in Fig 5A and Fig. S9D). Although prominent cellular  
26 abnormalities were detected during the first days past amputation (dpa), the investigated  
27 control and mutant fish showed no significant differences in overall tail length growth in the  
28 first 10dpa and only at 6dpa a difference in regenerate length was detected (Fig. S10). All  
29 fins grew normally to their former size after ~14dpa (data not shown), but small changes in  
30 fin morphology, e.g. cooped fin rays and loss of intersegmental tissues, could be observed in  
31 *fndc3a*<sup>wue1/wue1</sup> mutants 6 weeks past amputation (wpa; control: 1/10; *fndc3a*<sup>wue1/wue1</sup>: 8/10;  
32 Fig. S9E). Our regeneration experiments hint to rather minor and temporal effects of Fndc3a  
33 on regeneration during initiation and the first few days of regeneration and point to a potential  
34 compensatory mechanism or residual function of Fndc3a in the *fndc3a*<sup>wue1/wue1</sup> mutants.

35

1 ***fndc3a*<sup>wue1/wue1</sup> mutants display disorganized cellular arrangement in median fin folds**  
2 **and in caudal fin regenerates.**

3 Correct assembly of actinotrichia and correct caudal fin morphology are greatly dependent  
4 on the extracellular composition and the cell shape of surrounding epidermal cells during  
5 development and regeneration. These cellular characteristics within the median fin fold  
6 determine correct signaling, e.g. by Wnt signals, and cell behavior (Wehner et al., 2014;  
7 Wehner and Weidinger, 2015). Fibronectin domain containing proteins like *Fndc3a* have  
8 been linked to functions during ECM assembly and maintenance (Henderson et al., 2011).  
9 Thus, we assume that *Fndc3a* function during median fin fold development and caudal fin  
10 regeneration is provoked by cell shape or by ECM alterations in epidermal cells.

11 To follow-up on this assumption we analyzed cell membrane structure and the ECM in the  
12 median fin fold of control and *fndc3a*<sup>wue1/wue1</sup> mutants by investigating F-actin (Phalloidin  
13 staining) or  $\beta$ -catenin localization (Fig 6). Cell boundaries of control embryos displayed a  
14 dense, stereotypical assembly of epidermal cells in the ventral median fin fold at 22hpf (Fig.  
15 6A). Reduction of *Fndc3a* resulted in clustering of cells, altered cell shapes of ventral median  
16 fin fold epidermal cells (white arrows Fig. 6A) and appearance of cavities within the fin folds  
17 (white arrowheads and white dashed lines Fig. 6A). The cavities are zones within the tissue  
18 showing no F-actin and no nuclear staining, suggesting cell free spaces within the median fin  
19 fold. Further cellular observations were made by investigation of  $\beta$ -catenin localization at  
20 similar developmental stages (Fig. 6B). Homogeneous membranous localization was  
21 detected in cells of the ventral median fin fold of control embryos 24hpf and nuclear  
22 localization of  $\beta$ -catenin was detected in epithelial cells at the fin border (arrowheads in Fig.  
23 6B)(Nagendran et al., 2015). In *fndc3a*<sup>wue1/wue1</sup> mutants uniform localization of  $\beta$ -catenin at the  
24 cell membrane of epithelial cells was impaired and instead appeared as accumulations of the  
25 protein in a speckled fashion within the cytoplasm (white arrows in Fig. 6B). Nuclear  
26 localization of  $\beta$ -catenin was not completely abolished in *fndc3a*<sup>wue1/wue1</sup> mutants and was  
27 clearly detected in epithelial cells at the apical fin border, indicating maintenance of a Wnt  
28 gradient in these mutants (grey arrowheads in Fig. 6B). These experiments suggest a partial  
29 loss of epidermal cellular structure and loss of adhesion within the median fin fold of  
30 *fndc3a*<sup>wue1/wue1</sup> mutants during embryonic development.

31

32 Besides the effects on median fin fold development we additionally investigated potential  
33 ECM changes in regenerates of *fndc3a*<sup>wue1/wue1</sup> mutants by F-actin (Fig. 6C and 6D) and  $\beta$ -  
34 catenin staining (Fig. 6E and 6F). Comparison between controls and *fndc3a*<sup>wue1/wue1</sup> mutants  
35 clarified that similar distinctive features, i.e. altered cell matrix and appearance of cavities  
36 within the tissue, were also observed in regenerates between 2 and 8dpa. F-actin depicted

1 altered regenerate border shapes of *fndc3a*<sup>wue1/wue1</sup> mutants (dashed white line Fig. 6C) and  
2 appearance of regions showing cellular alterations (white arrows Fig. 6C). These obviously  
3 fragmented structures within the blastema appeared 2dpa and could be detected until 6dpa.  
4 High resolution microscopy clarified, that fragmented structures in 2dpa regenerates are  
5 cavities within the blastema (white arrowheads Fig. 6D). Cellular alterations were also  
6 detected in cells at the regenerative front of *fndc3a*<sup>wue1/wue1</sup> mutants at 4 to 8dpa by  $\beta$ -catenin  
7 immunostaining (Fig. 6E). Irregular blastema borders 4dpa were detected distinctly with the  
8 same staining (white arrows and close-up pictures in Fig. 6E). High resolution imaging also  
9 revealed  $\beta$ -catenin negative, detached cells outside of the regenerate (white arrowheads in  
10 Fig. 6F) and cavities (white arrows in Fig. 6F). Later stages of caudal regeneration did not  
11 seem to be compromised by reduced Fndc3a level, as fin regenerates of *fndc3a*<sup>wue1/wue1</sup>  
12 mutants were able to grow to similar fin lengths as control fish at 10dpa (Fig. S10). Our  
13 observations thereby indicate a partial loss of cellular structure and loss of adhesion within  
14 the blastema during early stages of caudal fin regeneration in *fndc3a*<sup>wue1/wue1</sup> mutants.

15 >Fig. 6

## 1 Discussion

2 Our functional investigations in zebrafish were initiated to proof clinical relevance and the  
3 pathomechanism of a novel candidate gene (*FNDC3A*) detected by whole-exome-  
4 sequencing in a family diagnosed with split-hand/split-foot malformation (SHFM; data not  
5 shown). SHFM has been associated with mutations in well described transcription factors,  
6 e.g. *DLX5/6* (OMIM \*600028; SHFM1; Crackower et al., 1996) or *TP63* (OMIM \*603273;  
7 SHFM4; Ianakiev et al., 2000). Mouse studies clarified the functional role of TP63 and DLX5  
8 during extremity development in mammals and linked both factors within a common  
9 regulatory pathway (Lo Iacono et al., 2008; Restelli et al., 2014). Further investigations show  
10 that functional and regulatory analyses of human SHFM candidate genes are feasible in  
11 zebrafish and result in detailed insights into molecular function of these genetic factors during  
12 vertebrate development (Birnbaum et al., 2012; Heude et al., 2014; Klopocki et al., 2012;  
13 Kouwenhoven et al., 2010).

14 *fndc3a* expression in developing zebrafish was first detected 14hpf in the tail bud and later in  
15 apical cells of the ventral median fin fold, the pectoral fins, the notochord and in cells of the  
16 chordo neural hinge. Fndc3a protein localization during these early stages of median fin fold  
17 development was detected mostly in the cell membrane of ectoderm derived cells and in  
18 notochord cells. Spatiotemporally similar expression patterns in the zebrafish median fin fold  
19 have been described for other genes causative for SHFM, e.g. *dlx5a* and *tp63* (Bakkers et  
20 al., 2002; Heude et al., 2014; Lee and Kimelman, 2002). Comparison of zebrafish *fndc3a*  
21 expression during extremity development to mouse *Fndc3a* expression shows a partially  
22 similar pattern, i.e. early in the AER of the limb bud and later in interdigital regions of feet  
23 (unpublished data; Gene expression database;  
24 <http://www.informatics.jax.org/expression.shtml>). Mouse *Fndc3a* loss-of-function knockouts  
25 result in male infertility, while defects in limb development were however not described  
26 (Obholz et al., 2006).

27 The CRISPR/Cas9 generated *fndc3a*<sup>wue1/wue1</sup> mutation in zebrafish, presented in our study,  
28 resulted in a premature Stop codon and predicted loss of six fibronectin domains in the  
29 corresponding protein. The mutation did not lead to complete nonsense mediated decay and  
30 a full loss-of-function phenotype, as residual *fndc3a* mRNA expression could be detected  
31 and the observed phenotypes are rather weak and partly transient. Morpholino knockdown  
32 and RNA overexpression experiments in wild type and in *fndc3a*<sup>wue1/wue1</sup> mutants,  
33 respectively, displayed on the one hand a consistent phenotype of the mutant and further a  
34 partial rescue of the induced mutation. On the other hand the experiments resulted also in an  
35 increased severity after Morpholino and RNA injection into *fndc3a*<sup>wue1/wue1</sup>, implying that the  
36 induced mutation does not abolish the function of the gene completely, but rather leads to a



1 reduced function and results in a hypomorphic mutation. Our results cannot exclude a  
2 compensation mechanism for fin development and regeneration in *fndc3a<sup>wue1/wue1</sup>* mutants,  
3 which after reduction of Fndc3a function would be able to recover cellular functions and  
4 ultimately lead to a rather normally developed caudal fin during larval development and in  
5 adult fish. Compensation could either be facilitated by residing functional Fndc3a proteins, as  
6 indicated by remaining transcripts in mutants, by other fibronectin homologues, or by  
7 activation of known signaling networks during fin development and regeneration (Wehner  
8 and Weidinger, 2015). The severe tail phenotype of transient double CRISPR injected  
9 individuals suggests a stronger phenotype after complete loss of Fndc3a and points towards  
10 interference with prominent signaling pathways, e.g. BMP and TGF-Beta signaling. Potential  
11 compensating factors might also be determined by looking at other orthologues of the *fndc3*  
12 gene family, e.g. *fndc3ba* and *fndc3bb*, but expression as well as function of these genes  
13 have not been investigated yet.

14 Initial mutant examination revealed a specific phenotype in the developing caudal fin of  
15 *fndc3a<sup>wue1/wue1</sup>* mutants, by showing loss of ventral median fin fold cells, loss of gene  
16 expression domains in the ventral fin fold, loss of actinotrichia fibers and Col2a accumulation.  
17 Most prominently a number of early markers in the ventral median fin fold 20 to 24hpf were  
18 reduced or altered in *fndc3a<sup>wue1/wue1</sup>* mutants, indicating cellular Fndc3a function in this  
19 specific region and phase of development, which correspond to regions with *fndc3a*  
20 expression. In contrast to more globally expressed genes linked to early caudal fin  
21 development and to actinotrichia deposition in zebrafish, e.g. *pinfin* mutants lacking Fras1  
22 function or *nage1* mutants lacking Hmcn1 function (Carney et al., 2010), the hypomorphic  
23 phenotype in *fndc3a<sup>wue1/wue1</sup>* mutants is milder and locally restricted. One cellular  
24 consequence of Fndc3a reduction was suspected to be involved with the assembly process  
25 of actinotrichia and collagen fibers during development, as indicated by altered Col2a  
26 location in *fndc3a<sup>wue1/wue1</sup>* mutants and by EM imaging. Collagen helix assembly is performed  
27 at the ER and is controlled by chaperones, especially Hsp47/SerpinH1 (Ricard-Blum, 2011).  
28 Interestingly, knockdown of *hsp47/serpinH1* results in a phenotype resembling  
29 *fndc3a<sup>wue1/wue1</sup>*, i.e. actinotrichia organization failure and regenerating fin deformations  
30 (Bhadra and Iovine, 2015). In comparison to published loss-of-function mutations in zebrafish  
31 collagen genes (e.g. *col1a1*: chi, *Chihuahua*; *col9a1*: prp, *persistent plexus*) which result in  
32 characteristic severe bone growth defects, skeletal dysplasia and vascular plexus formation  
33 (Fisher et al., 2003; Huang et al., 2009) the *fndc3a<sup>wue1/wue1</sup>* mutation has only a mild effect on  
34 late caudal fin development by interference with collagen assembly. Additional interference  
35 with expression domains of mesenchymal markers, e.g. *myoD*, hints to the notion that  
36 Fndc3a is required for the establishment of ventral cell fates of the developing median fin  
37 fold, by setting up the correct cellular structure in this region.

1 The process of median fin fold development is tightly regulated by modulation of epidermal  
2 cell shape and correct ECM assembly (Dane and Tucker, 1985; Nagendran et al., 2015).  
3 TP63 positive epidermal cells are still present in the *fndc3a*<sup>wue1/wue1</sup> mutants during median fin  
4 fold development 20 to 48hpf, but show reduced epidermal cell numbers at ventral positions,  
5 delayed ventral fin fold growth and altered morphological properties. Fndc3a shares  
6 fibronectin domain III protein domains with other well studied factors like Fibronectin 1, which  
7 are known to interact with prominent ECM proteins (Akiyama, 1996) and are essential for  
8 matrix assembly (Singh et al., 2010). The observed breakup of correct epidermal cell  
9 assembly and appearance of cavities in the ECM of basal epidermal cells after reduction of  
10 Fndc3a function indicate that Fndc3a might play a similar role in correct ECM assembly and  
11 establishment of correct cellular structures in the median fin fold. Potential downstream  
12 effects like misplaced mesodermal cells, loss of actinotrichia fibers and detached epidermal  
13 cells are most likely explained by deranged ECM structure in the early epidermal cell layer  
14 after Fndc3a reduction. Irregular caudal fin structures, for example, might be a consequence  
15 of early developmental irregularities as mesenchymal cells migrate after their induction along  
16 predetermined ECM structures and actinotrichia fibers to form the fin skeleton (Feitosa et al.,  
17 2012). Future experiments will have to clarify if binding of Fndc3a to integrins is abandoned  
18 in *fndc3a*<sup>wue1/wue1</sup> mutants, thereby directly influencing cell adhesion, basal epithelium  
19 establishment, and signaling (Towers and Tickle, 2009; Wada, 2011). This idea is supported  
20 by the phenotypic similarity of *fndc3a*<sup>wue1/wue1</sup> to *Imna5* and *itga3* mutants (Carney et al., 2010;  
21 Nagendran et al., 2015; Webb et al., 2007) and the occurrence of aberrant cells in the  
22 epidermal layer of regenerates in the *fndc3a*<sup>wue1/wue1</sup> mutants. Moreover our experiments do  
23 not rule out a potential function of Fndc3a during intracellular processes in the Golgi  
24 apparatus. Protein localization by Carrouel et al. (2008) clearly detected FNDC3A in the  
25 Golgi apparatus of human odontoblast. Reduction of Fndc3a function therefore may also  
26 result in hampered protein processing within this organelle and thereby interfere with  
27 modification of ECM proteins or membranous export.

28

29 Besides median fin fold development we investigated a potential function of Fndc3a during  
30 caudal fin regeneration. In accordance with median fin fold development, regeneration and  
31 blastema formation depends on correct epidermal cell assembly and a distinct ECM structure  
32 (Govindan and Iovine, 2015; Govindan et al., 2016). We initially detected *fndc3a* transcripts  
33 and Fndc3a protein in the distal blastema and in epidermal cell layers of regenerates 2 to  
34 8dpa. In *fndc3a*<sup>wue1/wue1</sup> mutants we observed several temporal effects on caudal fin  
35 regeneration: detached epidermal cells, Col2a accumulation, disorganized epidermal cells  
36 layers and lacking actinotrichia. These are comparable to the observed developmental

1 phenotype within the median fin fold and indicate ECM malformation to be causative for this  
2 effect on adult structures as well.

3 >Fig. 7

4 In summary, investigation of *fndc3a* expression and function in zebrafish reveals a transient  
5 and spatially restricted role of this genetic factor during extremity development and during fin  
6 regeneration. The observed effects after reduction of Fndc3a function on actinotrichia fibers  
7 and correct fin morphology are probably secondary and provoked by cellular changes. Most  
8 likely disruption of correct ECM structure in basal epidermal cells is the consequential  
9 underlying cellular mechanism responsible for the observed fin malformations. Our results  
10 demonstrate a cellular link between median fin fold development and caudal fin regeneration  
11 due to the necessity for correct cell shape and tissue cohesion in both processes via Fndc3a.  
12 Beyond this, our zebrafish experiments now suggest that Fndc3a can influence TP63  
13 positive epidermal cells by altering cell shape or cell adhesion during extremity development.  
14 Thus, Fndc3a can be functionally linked to known SHFM genes supporting a potential  
15 pathogenic relevance in SHFM phenotypes.

## 1 **Materials and Methods**

### 2 **Animal maintenance**

3 Laboratory zebrafish embryos (*Danio rerio*) of the *AB/TU* and *AB/AB* strain (ZDB-GENO-  
4 010924-10; ZDB-GENO-960809-7) were maintained as described by Westerfield  
5 (Westerfield, 2000) under standard aquatic conditions at an average of 24°C water  
6 temperature. Embryos were staged by morphological characteristics according to Kimmel et  
7 al. (Kimmel et al., 1995). hpf indicate hours-post fertilization at 28.5°C. All procedures  
8 involving experimental animals were performed in compliance with German animal welfare  
9 laws, guidelines, and policies. Generation of *fndc3a*<sup>wue1/wue1</sup> mutants and fin clipping was  
10 approved by the Committee on the Ethics of Animal Experiments of the University of  
11 Würzburg and the “Regierung von Unterfranken” (Permit Number: DMS-2532-2-13 and  
12 DMS-2532-2-9). The generated *fndc3a*<sup>wue1/wue1</sup> line was submitted to ZFIN.org (ZFIN ID: ZDB-  
13 ALT-170417-3).

14

### 15 **CRISPR/Cas9 system and construction of short guiding RNA (sgRNA) constructs**

16 For oligo cloning of sgRNA target sequences the previously published pDR274 vector was  
17 used (Hwang et al., 2013) (Addgene Plasmid #42250; sequences of primers used in this  
18 study are given in Table S1). For *cas9* RNA synthesis the MLM3613 (Hwang et al., 2013)  
19 (Addgene Plasmid #42251) or the pCS2-nCas9n vector (Jao et al., 2013) (Addgene Plasmid  
20 #47929) were utilized. Both vectors were purchased from Addgene ([www.addgene.org](http://www.addgene.org);  
21 Cambridge, USA). For designing and constructing of sgRNAs the open access ZIFit Targeter  
22 software (<http://zifit.partners.org/ZiFiT/>) was used. Specific target sites were identified by  
23 alignments of zebrafish and human sequences. sgRNA target site  
24 (GGATTCCAGGCCAGTTATGA) is located in exon 13 of *fndc3a* (ENSEMBL Zv9 Transcript:  
25 ENSDART00000097261) and targets the second Fibronectin type III domain, while sgRNA  
26 target site in exon 18 (GGCGTACAGTGGTTCGGCTC) targets the third Fibronectin type III  
27 domain.

28

### 29 **sgRNA transcription and microinjection**

30 sgRNAs were transcribed via the MAXIscript T7 kit (Ambion/ life technologies, Darmstadt,  
31 Germany) and were purified via phenol/chloroform extraction. *Cas9* RNA was transcribed via  
32 the mMESSAGING mMACHINE kit (Ambion/ Life Technologies, Darmstadt, Germany) and  
33 subsequently cleaned via RNeasy purification kit (Qiagen, Venlo, Netherlands). If the  
34 MLM3613 vector was used for *Cas9* Synthesis, polyA tail synthesis was performed with  
35 *E.coli* Poly(A) Polymerase (New England Biolabs, Ipswich, MA, USA) prior to purification.  
36 One cell stage zebrafish embryos were injected with solutions comprising sgRNA (25-50ng/μl

1 each), *cas9* RNA (75-100ng/μl), Phenol red (pH7.0; 0.05% final concentration; for  
2 visualization of injection solution) and Fluorescein isothiocyanate-dextran (Sigma-Aldrich;  
3 1mg/μl). Positively injected embryos were identified 24hpf by transient green fluorescence of  
4 Fluorescein isothiocyanate-dextran and were raised for line establishment.

5

#### 6 **Whole mount RNA in-situ hybridization**

7 RNA in situ hybridization was performed according to standard protocols (Hauptmann and  
8 Gerster, 1994; Thisse and Thisse, 2008). RNA probes were synthesized from cloned partial  
9 mRNA sequences of target genes using the DIG or FLU RNA Labeling Kit (Roche, Basel,  
10 Switzerland). We used a *fndc3a* cDNA fragment of 595bp size (used primers:  
11 *zf\_fndc3a\_ribo\_fwd2* and *zf\_fndc3a\_ribo\_rev2*) to synthesize a specific anti-sense RNA  
12 probe. Sense probes were synthesized as negative control for each anti-sense probe and  
13 were used under the same reaction conditions. Primers used for probe cloning are listed in  
14 Table S1.

15

#### 16 **Immunofluorescence and histology**

17 Immunofluorescence was performed on embryos, cryosections or on whole regenerating fins  
18 by standard protocols (Duran et al., 2011; Inoue and Wittbrodt, 2011). Apoptosis assays  
19 were performed according to Sorrells et al. (2013) (Sorrells et al., 2013) by visualization of  
20 cleaved caspase 3 via immunofluorescence. Primary antibodies used: *Fndc3a* (HPA008927;  
21 Sigma-Aldrich; dilution 1:50-100; Antibody Registry: AB\_1078899), *Col2a* (II-II6B3 was  
22 deposited to the DSHB by Linsenmayer, T.F. (DSHB Hybridoma Product II-II6B3); dilution  
23 1:500; Antibody Registry: AB\_528165), cleaved Caspase-3 (C92-605; Thermo Fisher  
24 Scientific; dilution 1:500; Antibody Registry: AB\_397274),  $\beta$ -catenin (610153; BD  
25 Biosciences; dilution 1:250; Antibody Registry: AB\_397554), TP63 (ab735; Abcam; dilution  
26 1:200; Antibody Registry: AB\_305870). Except *Fndc3a*, all used antibodies have been used  
27 previously for experiments in zebrafish and validated protocols have been previously  
28 published. Specificity of the used *Fndc3a* antibody was validated by the Human Protein Atlas  
29 project for usage in human tissues ([https://www.proteinatlas.org/ENSG00000102531-](https://www.proteinatlas.org/ENSG00000102531-FNDC3A/antibody)  
30 *FNDC3A/antibody*). Validation for usage in zebrafish was performed by epitope sequence  
31 analysis, antibody dilution series, and incorporation of adequate negative controls in all  
32 experiments. Cell nuclei were counterstained with Hoechst 33258 (Sigma-Aldrich; dilution  
33 1:5000). F-Actin was stained with Actin-stain 488 phalloidin (Cytoskeleton, Inc.; PHDG1-A;  
34 dilution 1:20).

35 Whole mount alcian blue staining was performed according to Walker and Kimmel (Walker

1 and Kimmel, 2007). H&E staining on 10µm paraffin sections was performed according to a  
2 general histology protocol using Mayer's Hematoxylin and Eosin.

3

#### 4 **Fin regeneration experiments**

5 For fin amputation experiments adult zebrafish (mixed sex, age 3-5 months, 3 independent  
6 experiments) were anesthetized with tricaine (MS-222; 3-amino benzoic acid ethyl ester; final  
7 concentration ~150mg/l) prior to amputation of ~20% length the of caudal fin. Images were  
8 taken 0, 2, 6, 8 and 10 days post-amputation (dpa) under a stereomicroscope. To increase  
9 the expected phenotype fish were kept at an increased temperature (32°C) during the  
10 experiments. Regenerate samples for immunofluorescence, in-situ hybridization, genotyping,  
11 or histology were taken by a second amputation anterior to the first lesion site (2, 4, 6 and  
12 8dpa).

13

#### 14 **Image acquisition and quantification**

15 Images were acquired depending on the experiment either with a Leica S8 APO  
16 Stereomicroscope (whole embryos), a Zeiss Imager A1 (in-situ hybridizations) or a Nikon  
17 A1+ Laser scanning confocal microscope (Immunofluorescence). Image acquisition was  
18 performed via device specific cameras/detector and corresponding software (Leica  
19 Application suite; Zeiss AxioVision; Nikon NIS-Elements). Further image analyses and  
20 quantifications were performed with ImageJ/Fiji (<https://fiji.sc/>). For figure arrangement  
21 CorelDraw Graphics Suite x7 software (Corel Corporation) was used.

22 Quantification of median fin fold width was performed with ImageJ/Fiji by length  
23 measurement of maximum intensity projections of TP63/Hoechst stained embryos 24 and  
24 48hpf. Each embryo was measured at three independent positions at the dorsal or ventral  
25 median fin fold. Median fin fold width was measured between the apical fin and somite  
26 borders. Quantification of epidermal cells in 24hpf embryos was performed by automated  
27 counting of TP63 positive cells in confocal stacks (size z: 40; z-step: 2µm) on the complete  
28 ventral and dorsal median fin folds. While in 48hpf embryos three independent positions of  
29 the same size (ventral and dorsal median fin fold, tail tip; 8800 µm<sup>2</sup>) were investigated per  
30 sample. Used ImageJ plugins and commands: *Stack/Z Project*, *Despeckle*, *Watersheed*,  
31 *Analyze particles* (size 2-10µm, circularity 0.5-1.0). A minimum of 12 samples for each  
32 condition was investigated.

33

## 1 **Electron microscopy**

2 Embryos or regenerates were washed with PBS and fixed (2.5% glutaraldehyde, 50 mM  
3 cacodylat pH 7.2, 50 mM KCl, and 2.5 mM MgCl<sub>2</sub>) overnight at 4°C. Subsequently, embryos  
4 or tissues were washed five times with 50 mM cacodyl buffer (pH 7.2) and fixed for 4 h with  
5 2% OsO<sub>4</sub> in 50 mM cacodylat (pH 7.2) buffer. Embryos or tissues were subsequently stained  
6 with 2% uranylacetate overnight. After gradual dehydration with ethanol, they were  
7 transferred to propylenoxid and embedded in Epon (SERVA Electrophoresis GmbH,  
8 Heidelberg, Germany). Ultrathin sections were analyzed using an EM10 from Zeiss  
9 (Oberkochen, Germany).

10

## 11 **qPCR experiments**

12 For qPCR experiments RNA was extracted from pools of 12 embryos each (age 24hpf; F3  
13 *fndc3a*<sup>wue1/+</sup> and *fndc3a*<sup>wue1/wue1</sup> generation; control: *AB*). For each genotype three  
14 independent pools were generated and compared. For cDNA synthesis 1µg RNA was  
15 transcribed into cDNA and further analyzed in a ViiA7 Real-Time PCR System (Thermo  
16 Fisher Scientific). Each group and primer sample was analyzed in triplicates on a single  
17 qPCR plate utilizing HOT FIREPoI Eva Green Mix Plus (Solis Biodyne). Data analysis of was  
18 performed via QuantStudio Real-Time PCS Software v1.1 by  $\Delta\Delta C_t$  method. *AB* control  
19 samples were used as reference sample for relative comparison. Amplification of *gapdh* and  
20 *eef1a111* was used as endogenous/housekeeping controls. Used primer pairs, amplicon  
21 sizes and targeted regions are noted in table S1. Experiments were performed according to  
22 MIQE guidelines.

## 1 **Acknowledgements**

2 The authors thank Anja Kirschbauer for professional fish keeping support, Tabea Röder for  
3 in-situ probe synthesis, Prof. Dr. Manfred Scharl for sharing aquatic equipment, as well as  
4 Claudia Gehrig and Daniela Bunsen from the Electron Microscopy Unit of the Biozentrum at  
5 the University of Würzburg, for preparation of ultrathin sections and support with the electron  
6 microscopy analysis. We are indebted to Prof. Dr. Christoph Winkler for fruitful discussions.

7

## 8 **Competing interests**

9 The authors declare no competing interests.

10

## 11 **Funding**

12

## 13 **Data availability**

14

## 15 **Author contributions**

16 D.L., S.G. and E.K. designed the experiments. D.L., I.K., S.K., M.M. and M.O. conducted the  
17 experiments. D.L. and E.K. wrote the manuscript with input from all authors.



## 1 Figures and Tables

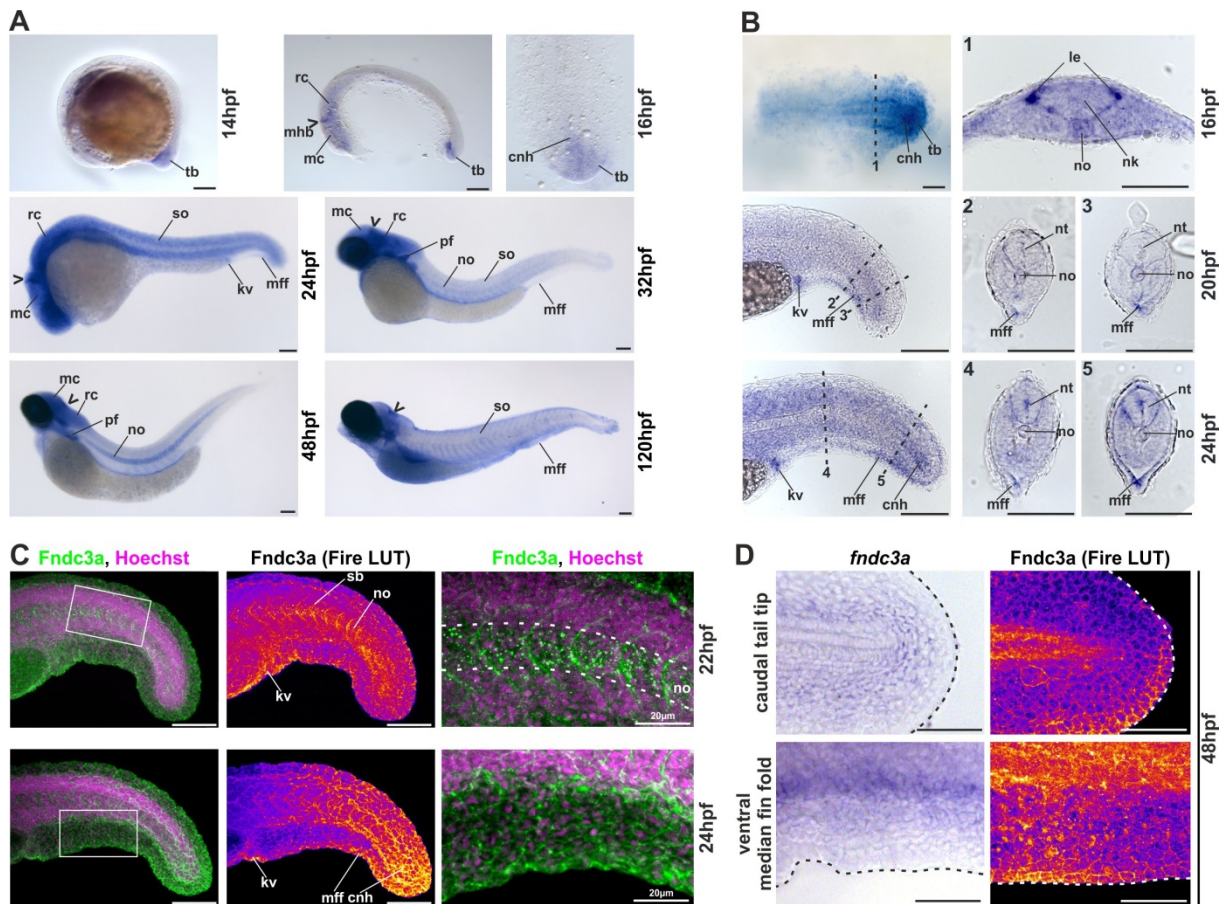

2  
3 **Fig. 1: Localization of *fndc3a* RNA and protein during embryonic zebrafish development.**

4 (A and B) Expression of *fndc3a* is detected in the tail bud and the median fin fold from 14hpf onwards. During  
5 subsequent stages of zebrafish development *fndc3a* is expressed in pectoral fins, somites and notochord cells.  
6 Neuronal tissues express *fndc3a* starting from 16hpf in the midbrain-hindbrain boundary (marked by the chevron),  
7 the mesencephalon, and the rhombencephalon. (B) Investigation of long-time stained embryos and transversal  
8 sections indicated varying *fndc3a* expression in the tail bud region, at the lateral edge of the neural keel, at the  
9 ventral median fin fold, at Kupffer's vesicle, and in chordo neural hinge cells. (C) Detection of Fndc3a protein via  
10 immunofluorescence indicated similar regional localization as *fndc3a* mRNA in 22-24hpf embryos. Furthermore it  
11 showed intracellular accumulation of Fndc3a at notochord cells, at somite boundaries and epidermal cells at this  
12 stage. (D) Cellular localization of Fndc3a during median fin fold development at 48hpf corresponds to regions of  
13 mRNA expression and could be observed intracellular and at cell boundaries of epidermal cells.  
14 Dashed lines in B indicate planes of the corresponding numbered sections 1-5. Dashed lines in C indicate  
15 notochord boundary. Dashed lines in D indicate fin fold border.

16 cnh: chordo neural hinge; kv: Kupffer's vesicle; le: lateral edge; mc: mesencephalon; mff: median fin fold; mhb:  
17 midbrain hindbrain boundary (marked with chevron); nk: neural keel; no: notochord; nt: neural tube; pf: pectoral  
18 fin; sb: somite boundary; so: somites; tb: tail bud; rc: rhombencephalon.

19 Scale bars: 100µm, except higher magnification in C: 20µm.

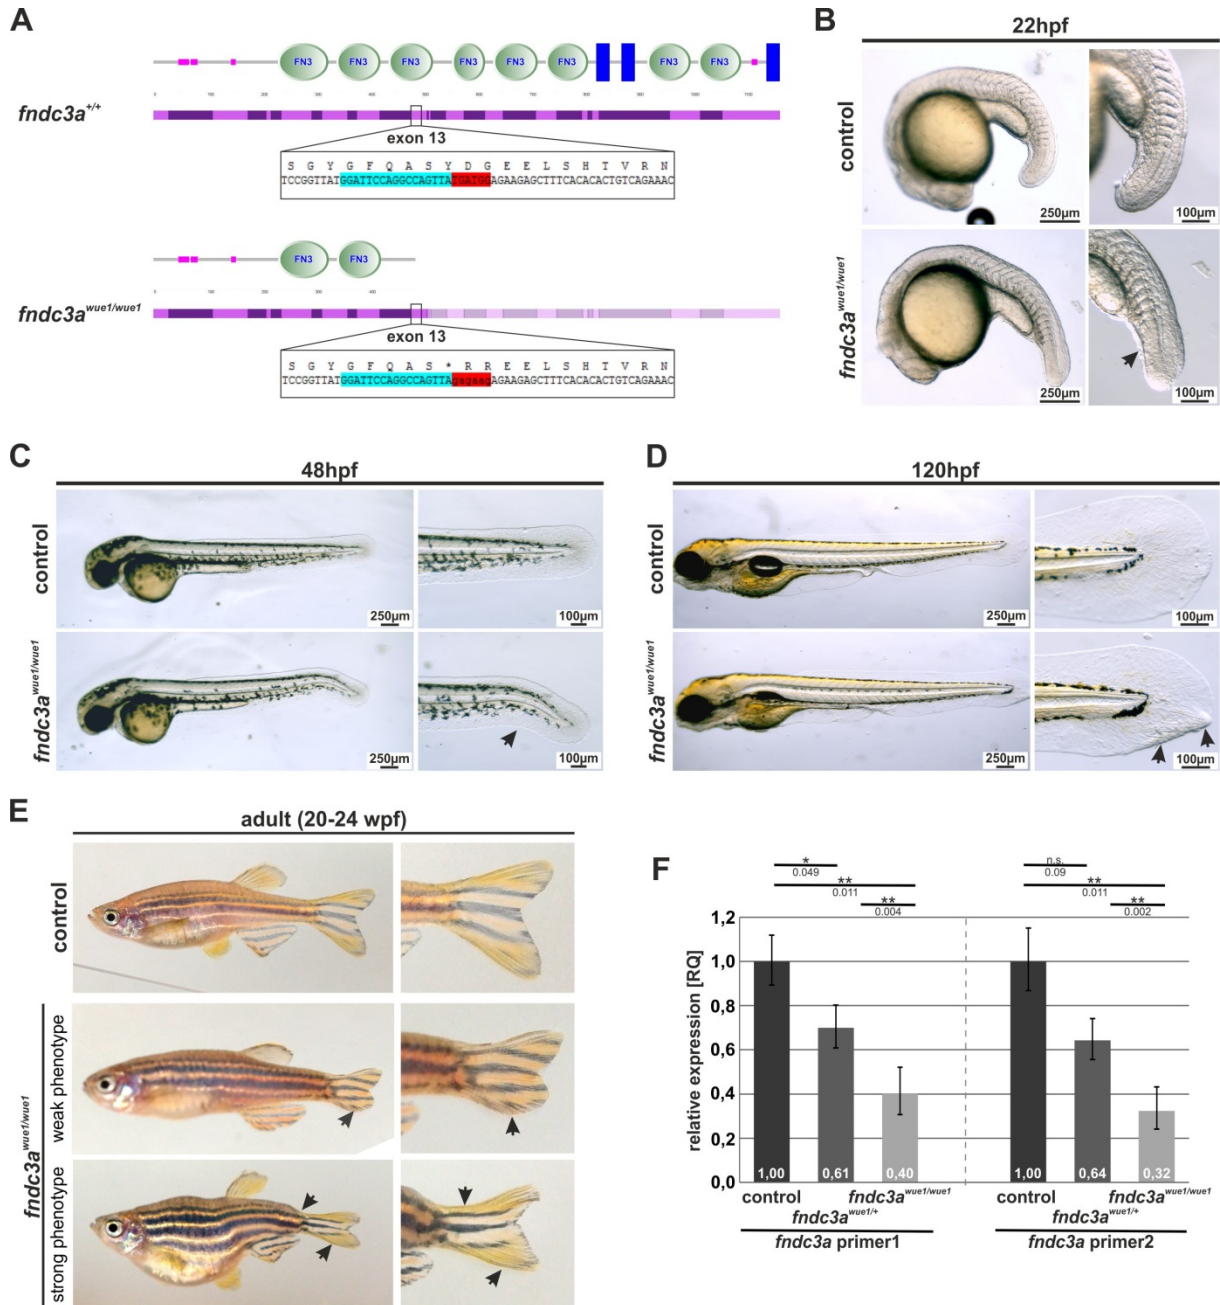

**Fig. 2: Generation and phenotype of *fndc3a*<sup>wue1/wue1</sup> zebrafish mutants.**

(A) The CRISPR/Cas9 system was used to target exon 13 in the zebrafish *fndc3a* gene coding for the third fibronectin type III domain (nucleotides marked in blue indicate sgRNA target sequence; nucleotides marked in red indicate the region of mutated sequence). (B-D) *fndc3a*<sup>wue1/wue1</sup> mutants show straightened tail buds (n=19/40), kinked tails (n= 27/100), and actinotrichia fiber aggregation during the first days of embryonic development (n= 9/41; indicated by arrows). (E) A fraction of adult *fndc3a*<sup>wue1/wue1</sup> mutants display weak (n= 15/71) to strong (n= 6/71) caudal fin phenotypes and tail malformations. (F) qPCR quantification of relative *fndc3a* expression levels in genotypic different groups of embryos indicated reduction of *fndc3a* transcripts in *fndc3a*<sup>wue1/+</sup> and *fndc3a*<sup>wue1/wue1</sup> ( $\Delta\Delta Ct$  calculation; comparison of biological triplicates for each genotype with twelve 24hpf embryos each; two independent *fndc3a* primer pairs; normalized against *AB* controls; *gapdh* and *ef1a11* expression were used as endogenous/housekeeping controls; significance levels and p-values of a 2-sided paired student t-test are given).

Scale bars for embryo overview: 250µm; scale bars for tail magnifications: 100µm.

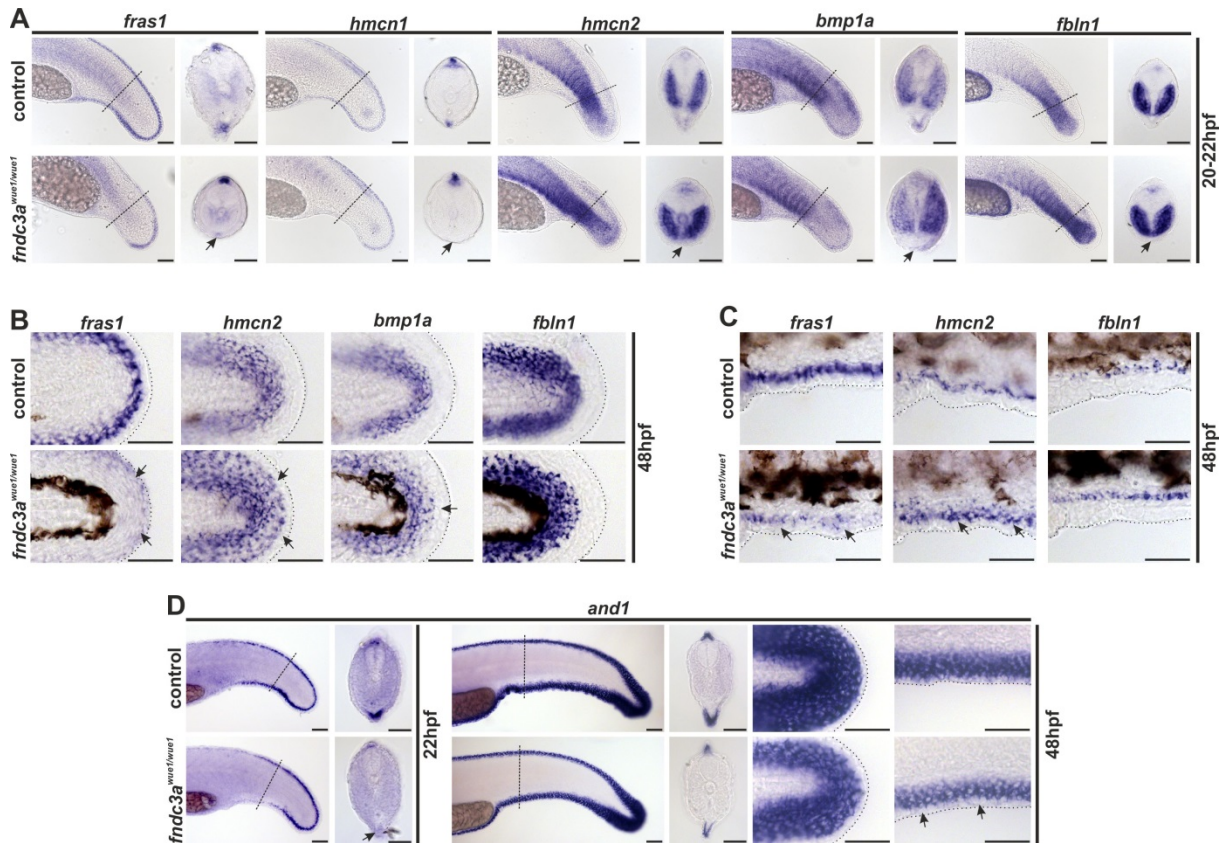

1

2 **Fig. 3: Normal development of the ventral median fin fold is altered in *fndc3a*<sup>wue1/wue1</sup> mutants.**

3 (A) Investigation of *fras1*, *hmcn1*, *hmcn2*, *bmp1a*, and *fbln1* expression in the tail bud 20-22hpf indicates loss of

4 mesenchymal cells in the median fin fold in *fndc3a*<sup>wue1/wue1</sup> mutants (arrows; *fras1*: 9/32; *hmcn1*: 11/26; *hmcn2*:

5 24/43; *bmp1a*: 22/45; *fbln1*: 16/32). (B) Expression of mesenchymal markers in posterior fins of 48hpf old

6 embryos is slightly changed following loss of *fndc3a* (*fras1*: 10/24; *hmcn2*: 12/25; *bmp1a*: 8/21; *fbln1*: 9/24). (C)

7 Ventral fin folds in 48hpf old embryos do not show loss of mesenchymal markers after *fndc3a*<sup>wue1/wue1</sup> mutation.

8 (D) Expression of *and1* in *fndc3a*<sup>wue1/wue1</sup> in the ventral fin fold is partly lost in 22hpf embryos (12/25), but recovers

9 in 48hpf old embryos to a reduced expression level (control n=16; weaker expression in *fndc3a*<sup>wue1/wue1</sup> embryos

10 n=10/18).

11 Dashed lines in A and D indicate planes of shown sections. Dashed lines in B and C indicate fin boundaries.

12 Scale bars: 50μm

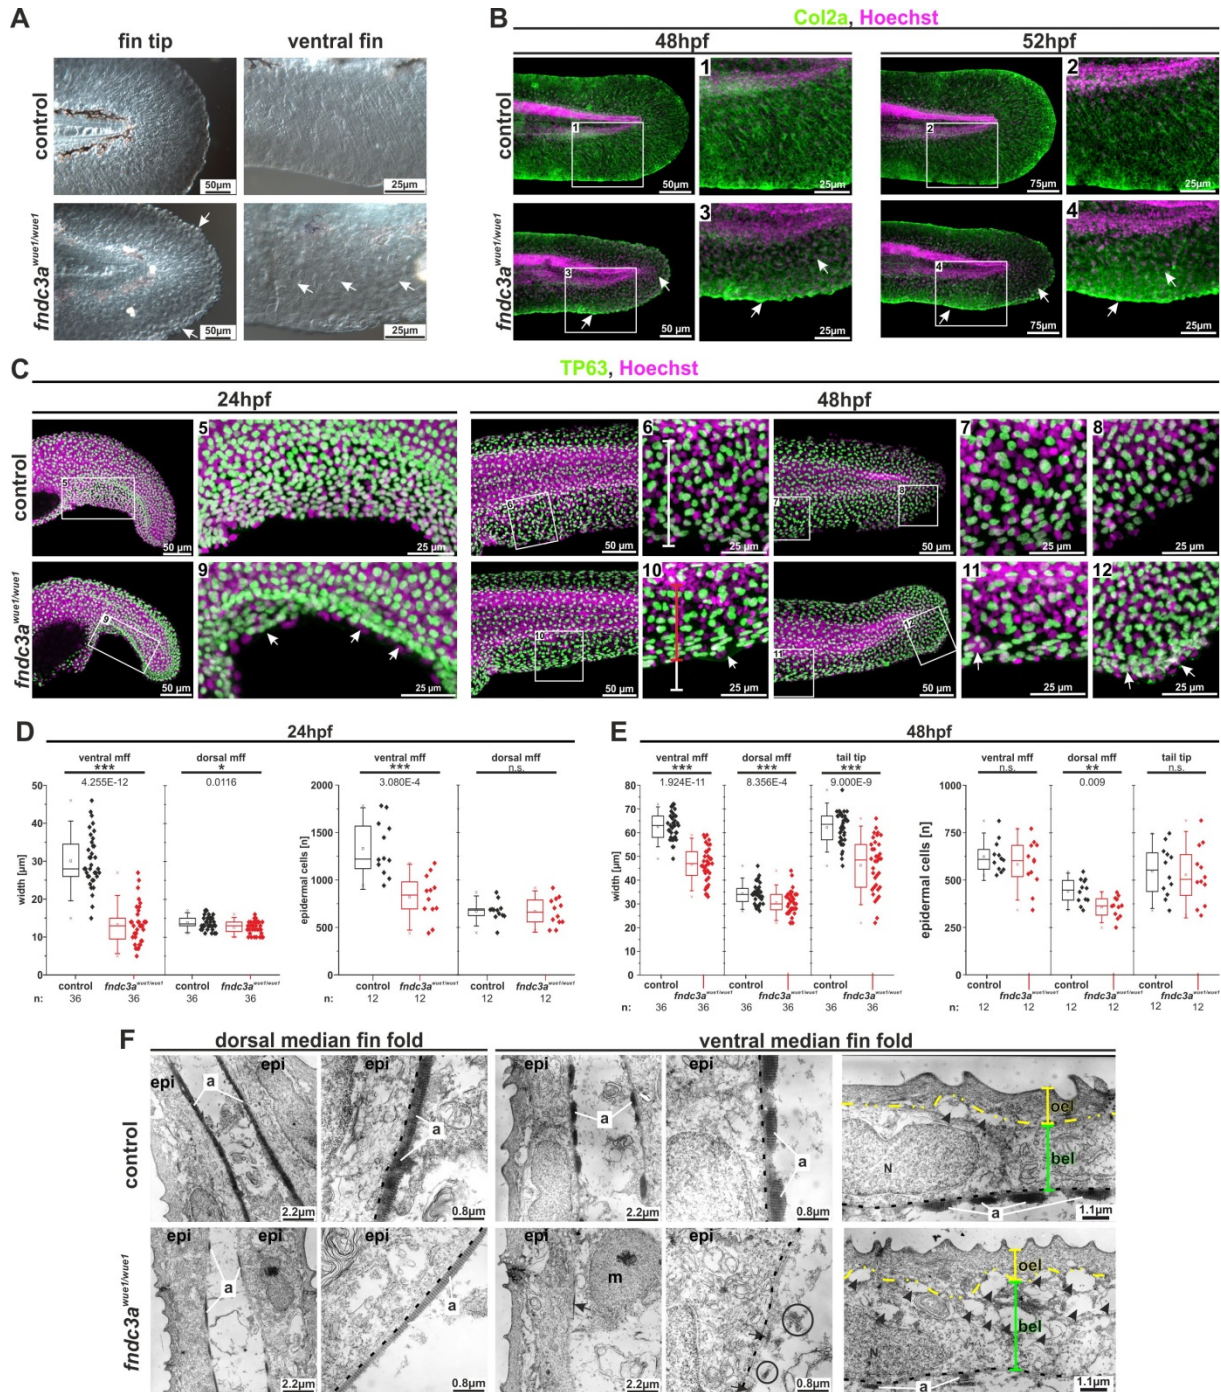

**Fig. 4: The *fndc3a<sup>wue1/wue1</sup>* mutation results in structural defects in epidermal cells during fin development.**

Visualization of actinotrichia either by differential interference contrast microscopy (A) or by immunofluorescence

staining of Col2a (B) showed loss of mature actinotrichia in *fndc3a<sup>wue1/wue1</sup>* mutants 48 to 52 hpf (number of

affected embryos: control = 0/17; *fndc3a<sup>wue1/wue1</sup>* = 19/26; white arrows indicate lost actinotrichia and Col2a

accumulation in apical cells of the median fin fold). (C) Investigation of TP63 positive cells in *fndc3a<sup>wue1/wue1</sup>*

mutants showed reduced width and reduced epidermal cell number in the ventral median fin fold in *fndc3a<sup>wue1/wue1</sup>*

mutants. (D, E) Quantification of median fin fold width and TP63 positive cells in 24 and 48hpf embryos (Mann-

Whitney U test;  $p < 0.05$ ; two-tailed, U values are indicated for significant changes). (F) Ultrastructural analyses of

dorsal and ventral fins of control (upper row) or *fndc3a<sup>wue1/wue1</sup>* mutants (lower row) reveal breakdown of

actinotrichia fibers and cellular malformations in cells of the basal epidermal layer in the ventral fin folds of 52hpf

old embryos (arrows indicate site of remaining actinotrichia, circles indicate misplaced fibers; dashed grey lines

indicate remaining actinotrichia fibers).

- 1 indicate the basal membrane; yellow lines indicate outer epidermal cells and green lines indicate basal epidermal
- 2 cells; Black arrowheads indicate cavities).
- 3 a: actinotrichia; bel: basal epidermal layer; epi: epidermis; mff: median fin fold; m: mesenchymal cell; N: nucleus;
- 4 oel: outer epidermal layer.

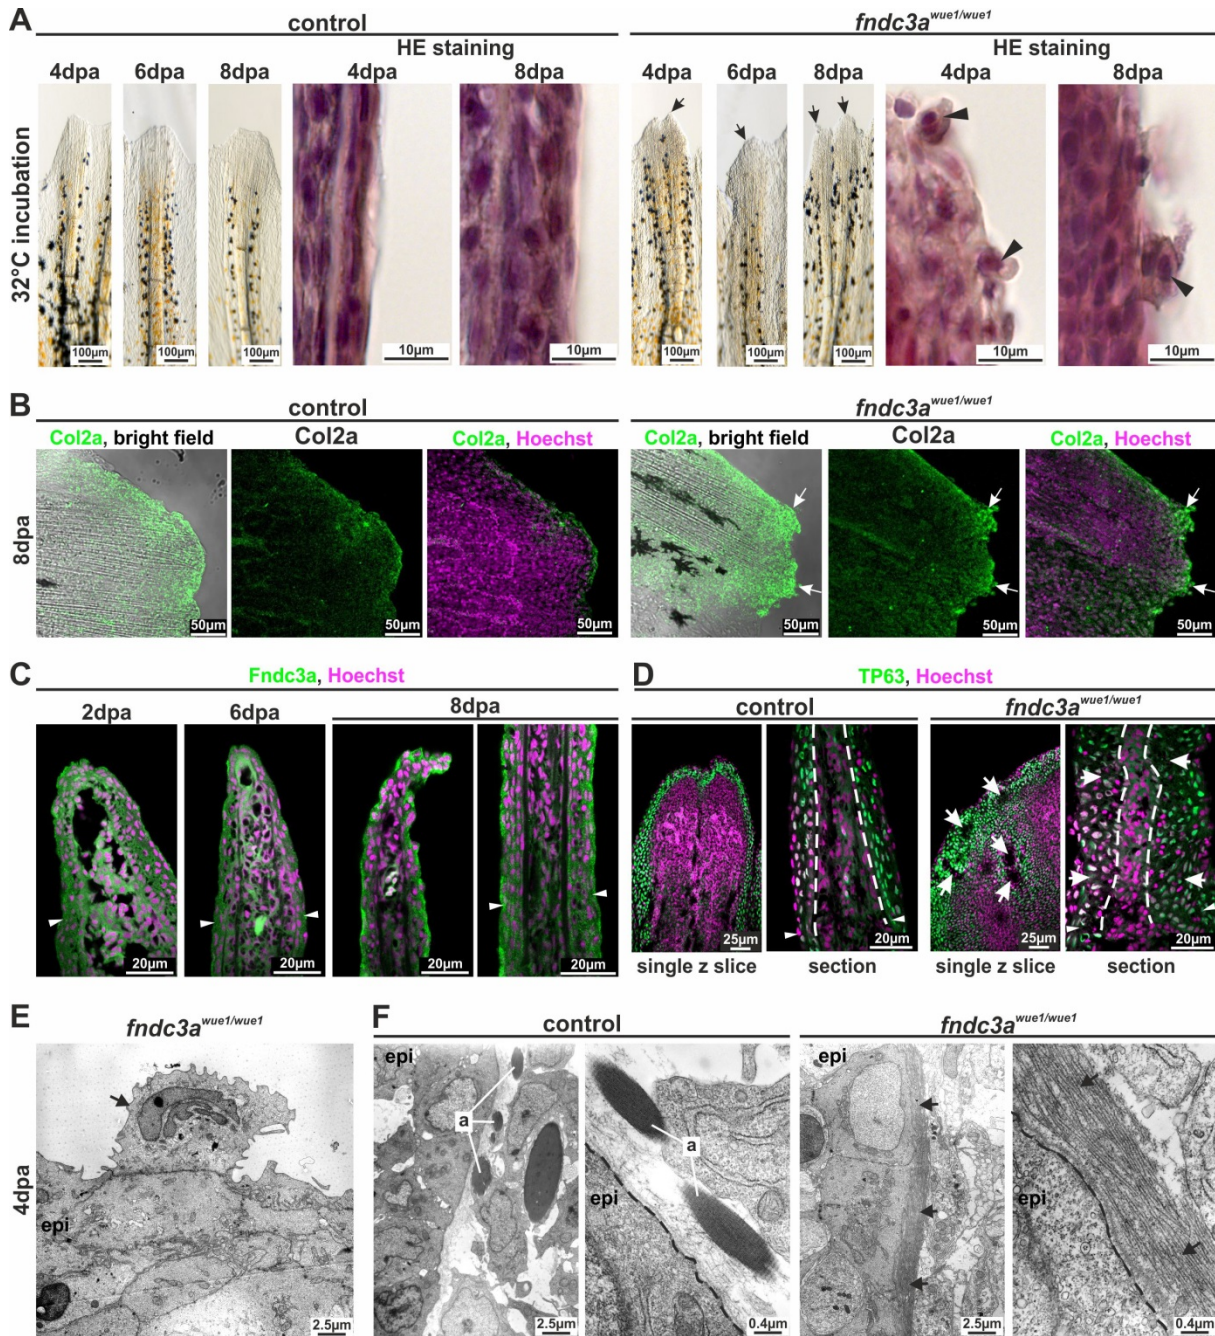

**Fig. 5: Interference with FnDC3a function during fin regeneration results in epidermal cells defects.**

(A) Phenotypical and histological investigations of fin regeneration in *fndc3a<sup>wue1/wue1</sup>* mutants indicate abnormal regeneration by showing unorganized fin borders at the regenerative front (arrows) and aberrant epidermal cells (arrowheads; abnormal regenerate phenotypes 6dpa: control: 3/19; *fndc3a<sup>wue1/wue1</sup>*: 13/19). (B) Col2a protein localization visualized via immunofluorescence on 8dpa regenerates shows accumulation of collagen in these abnormal cells of *fndc3a<sup>wue1/wue1</sup>* mutants (white arrows; n=6 for each group). (C) Localization of FnDC3a in regenerates can be detected in epidermal cell layers (white arrowheads indicate amputation site). (D) TP63 staining in regenerates of *fndc3a<sup>wue1/wue1</sup>* mutants 4dpa indicates disorganization of epidermal cells (white arrows; white arrowheads indicate amputation site; n=4 for each group). (E) TEM analysis showed accumulation of electron dense material in the Golgi apparatus of abnormal cells attached to the epidermal layer (arrow). (F) TEM analyses of actinotrichia in fin regenerates 4dpa reveal loss of these fibers located near the basal membrane (arrows) in *fndc3a* depleted fish.

a: actinotrichia; epi: epidermis; dashed lines indicate basal membrane.

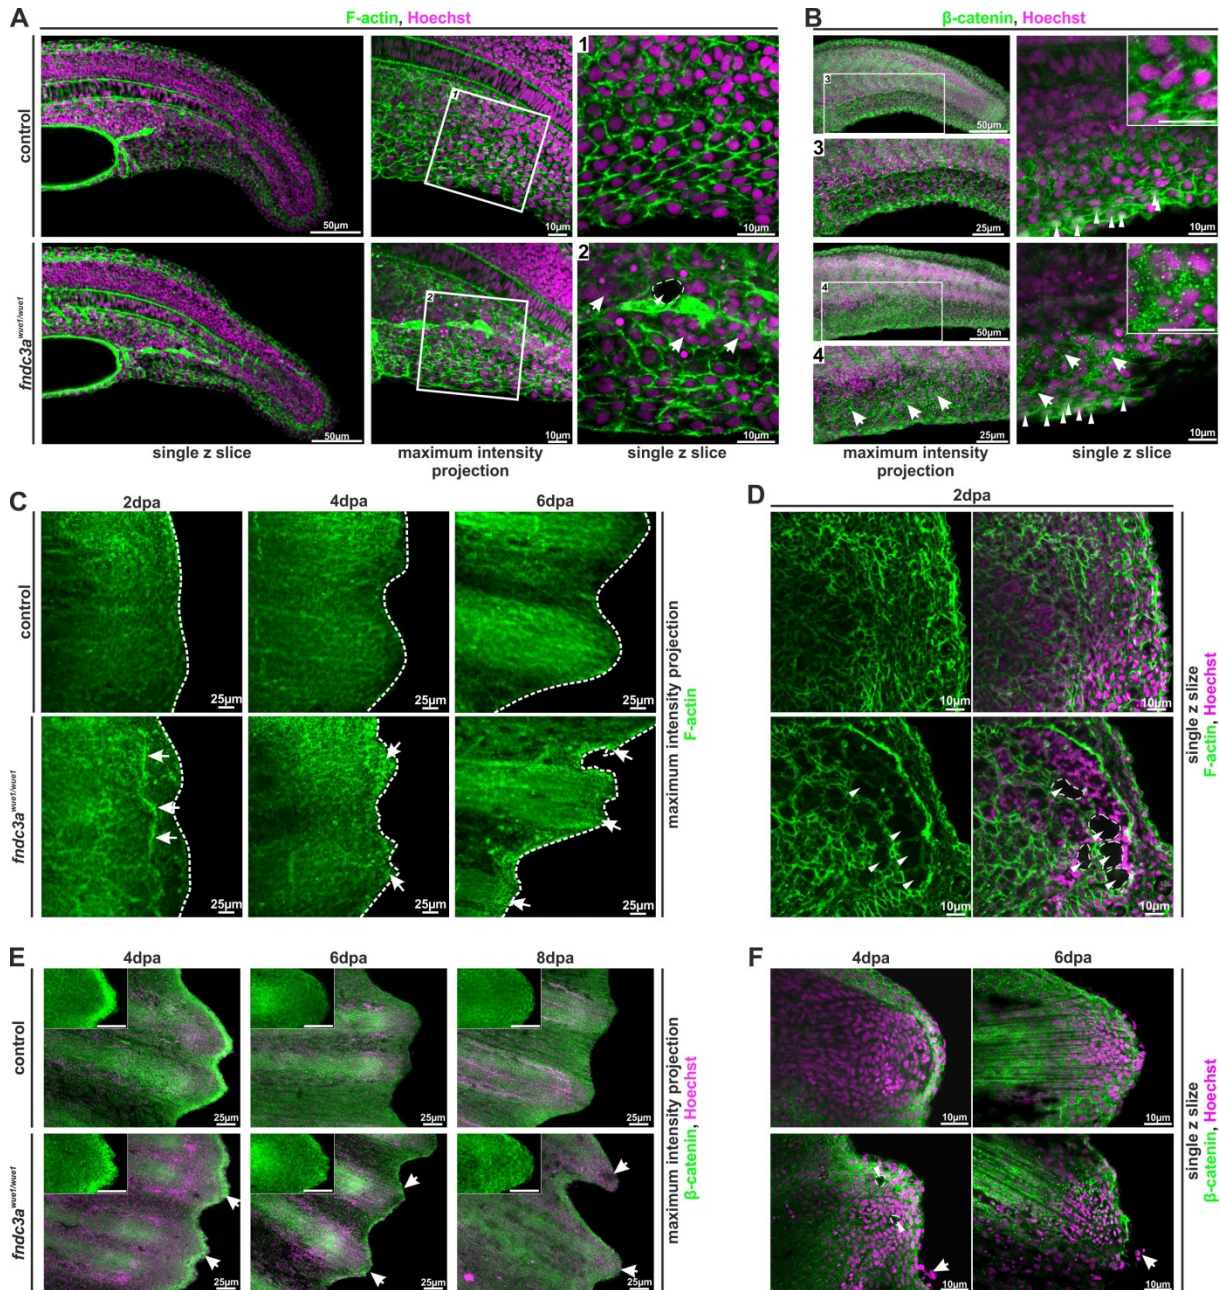

**Fig. 6: Correct ECM structure in the median fin fold and regenerating caudal fins is hampered in**

***fndc3a*<sup>wue1/wue1</sup> mutants.**

(A) F-actin in the median fin fold 22hpf was visualized by phalloidin staining, (B) localization of  $\beta$ -catenin during fin development was visualized by immunofluorescence of 24hpf embryos (n=6 for each group). Both colorations mark cell membranes and ECM structures. Cellular organization of ventral median fin fold cells and ECM matrix is symmetrically structured in control embryos and shows nuclear localization of active Wnt signals in cells at the fin fold tip (white arrowheads in B). *fndc3a*<sup>wue1/wue1</sup> mutants depict cellular alterations and unstructured ECM assembly by showing irregular cell shapes (white arrows in A), cavities within the fin fold (white arrowheads in A2) and speckled accumulation of  $\beta$ -catenin between cells (white arrows in B). Nuclear localization of  $\beta$ -catenin in cells at the fin fold tip was maintained (grey arrowheads in B). (C and D; n=4 for each group) Fin regenerates of *fndc3a*<sup>wue1/wue1</sup> mutants incubated at 32°C and stained for F-actin showed regenerate abnormalities (white arrows in C), irregular regenerate borders (white dashed lines in C) and cellular cavities (white arrowheads in D) (E and F; n=3 for each group) Fin regenerates of *fndc3a*<sup>wue1/wue1</sup> mutants also depicted intracellular accumulation of  $\beta$ -catenin, divergent ECM assembly (white arrows) in addition to appearance of abnormal cells loosely attached to

- 1 the regenerate (white arrowheads).
- 2 Images either show maximum intensity projections (30 to 40 single z-slices; z-distance: 1.5 $\mu$ m) or a
- 3 representative higher resolution single z slice.



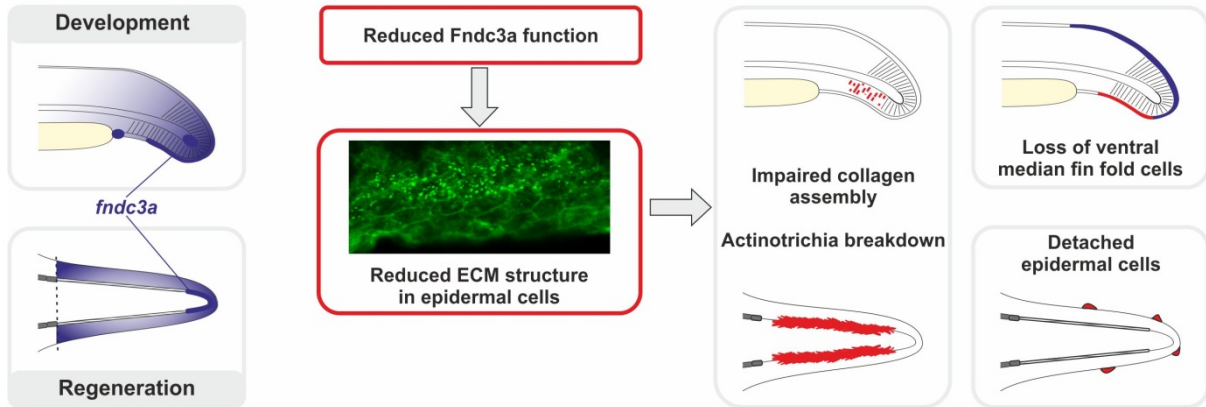

1

2 **Fig. 7: Model of Fndc3a function during zebrafish median fin fold development and caudal fin**  
3 **regeneration.**

4 Expression and localization of *fndc3a* can be detected during early phases of median fin fold development and in  
5 caudal fin regenerates. Reduced Fndc3a function results in prominent changes of ECM structure of epidermal  
6 cells. During development this results in impaired collagen assembly of actinotrichia fibers and loss of ventral  
7 median fin fold cells. During regeneration altered ECM structure results in actinotrichia breakdown and detached  
8 epidermal cells.

## 1 References

- 2           **Akiyama, S. K.** (1996). Integrins in cell adhesion and signaling. *Hum Cell* **9**, 181-6.
- 3           **Amaral, D. B. and Schneider, I.** (2017). Fins into limbs: Recent insights from sarcopterygian  
4 fish. *Genesis*.
- 5           **Asharani, P. V., Keupp, K., Semler, O., Wang, W., Li, Y., Thiele, H., Yigit, G., Pohl, E., Becker,**  
6 **J., Frommolt, P. et al.** (2012). Attenuated BMP1 function compromises osteogenesis, leading to bone  
7 fragility in humans and zebrafish. *Am J Hum Genet* **90**, 661-74.
- 8           **Bakkers, J., Hild, M., Kramer, C., Furutani-Seiki, M. and Hammerschmidt, M.** (2002).  
9 Zebrafish DeltaNp63 is a direct target of Bmp signaling and encodes a transcriptional repressor  
10 blocking neural specification in the ventral ectoderm. *Dev Cell* **2**, 617-27.
- 11           **Bhadra, J. and Iovine, M. K.** (2015). Hsp47 mediates Cx43-dependent skeletal growth and  
12 patterning in the regenerating fin. *Mech Dev* **138 Pt 3**, 364-74.
- 13           **Birnbaum, R. Y., Everman, D. B., Murphy, K. K., Gurrieri, F., Schwartz, C. E. and Ahituv, N.**  
14 (2012). Functional characterization of tissue-specific enhancers in the DLX5/6 locus. *Hum Mol Genet*  
15 **21**, 4930-8.
- 16           **Carney, T. J., Feitosa, N. M., Sonntag, C., Slanchev, K., Kluger, J., Kiyozumi, D., Gebauer, J.**  
17 **M., Coffin Talbot, J., Kimmel, C. B., Sekiguchi, K. et al.** (2010). Genetic analysis of fin development in  
18 zebrafish identifies furin and hemicentin1 as potential novel Fraser syndrome disease genes. *Plos*  
19 *Genetics* **6**, e1000907.
- 20           **Carrouel, F., Couble, M. L., Vanbelle, C., Staquet, M. J., Magloire, H. and Bleicher, F.** (2008).  
21 HUGO (FNDC3A): a new gene overexpressed in human odontoblasts. *J Dent Res* **87**, 131-6.
- 22           **Cheng, P., Andersen, P., Hassel, D., Kaynak, B. L., Limphong, P., Juergensen, L., Kwon, C.**  
23 **and Srivastava, D.** (2013). Fibronectin mediates mesendodermal cell fate decisions. *Development*  
24 **140**, 2587-96.
- 25           **Crackower, M. A., Scherer, S. W., Rommens, J. M., Hui, C. C., Poorkaj, P., Soder, S., Cobben,**  
26 **J. M., Hudgins, L., Evans, J. P. and Tsui, L. C.** (1996). Characterization of the split hand/split foot  
27 malformation locus SHFM1 at 7q21.3-q22.1 and analysis of a candidate gene for its expression during  
28 limb development. *Hum Mol Genet* **5**, 571-9.
- 29           **Dane, P. J. and Tucker, J. B.** (1985). Modulation of epidermal cell shaping and extracellular  
30 matrix during caudal fin morphogenesis in the zebra fish *Brachydanio rerio*. *J Embryol Exp Morphol*  
31 **87**, 145-61.
- 32           **Duijff, P. H., van Bokhoven, H. and Brunner, H. G.** (2003). Pathogenesis of split-hand/split-  
33 foot malformation. *Hum Mol Genet* **12 Spec No 1**, R51-60.
- 34           **Duran, I., Csukasi, F., Taylor, S. P., Krakow, D., Becerra, J., Bombarely, A. and Mari-Beffa, M.**  
35 (2015). Collagen duplicate genes of bone and cartilage participate during regeneration of zebrafish  
36 fin skeleton. *Gene Expr Patterns* **19**, 60-9.
- 37           **Duran, I., Mari-Beffa, M., Santamaria, J. A., Becerra, J. and Santos-Ruiz, L.** (2011).  
38 Actinotrichia collagens and their role in fin formation. *Dev Biol* **354**, 160-72.
- 39           **Feitosa, N. M., Zhang, J., Carney, T. J., Metzger, M., Korzh, V., Bloch, W. and**  
40 **Hammerschmidt, M.** (2012). Hemicentin 2 and Fibulin 1 are required for epidermal-dermal junction  
41 formation and fin mesenchymal cell migration during zebrafish development. *Dev Biol* **369**, 235-48.
- 42           **Fisher, S., Jagadeeswaran, P. and Halpern, M. E.** (2003). Radiographic analysis of zebrafish  
43 skeletal defects. *Dev Biol* **264**, 64-76.
- 44           **Gautier, P., Naranjo-Golborne, C., Taylor, M. S., Jackson, I. J. and Smyth, I.** (2008).  
45 Expression of the *fras1/frem* gene family during zebrafish development and fin morphogenesis. *Dev*  
46 *Dyn* **237**, 3295-304.
- 47           **Govindan, J. and Iovine, M. K.** (2015). Dynamic remodeling of the extra cellular matrix during  
48 zebrafish fin regeneration. *Gene Expr Patterns* **19**, 21-9.
- 49           **Govindan, J., Tun, K. M. and Iovine, M. K.** (2016). Cx43-Dependent Skeletal Phenotypes Are  
50 Mediated by Interactions between the Hapln1a-ECM and Sema3d during Fin Regeneration. *PLoS One*  
51 **11**, e0148202.

- 1           **Grandel, H. and Schulte-Merker, S.** (1998). The development of the paired fins in the  
2 zebrafish (*Danio rerio*). *Mech Dev* **79**, 99-120.
- 3           **Gurrieri, F. and Everman, D. B.** (2013). Clinical, genetic, and molecular aspects of split-  
4 hand/foot malformation: an update. *Am J Med Genet A* **161A**, 2860-72.
- 5           **Hauptmann, G. and Gerster, T.** (1994). Two-color whole-mount in situ hybridization to  
6 vertebrate and *Drosophila* embryos. *Trends Genet* **10**, 266.
- 7           **Henderson, B., Nair, S., Pallas, J. and Williams, M. A.** (2011). Fibronectin: a multidomain  
8 host adhesin targeted by bacterial fibronectin-binding proteins. *FEMS Microbiol Rev* **35**, 147-200.
- 9           **Heude, E., Shaikho, S. and Ekker, M.** (2014). The *dlx5a/dlx6a* genes play essential roles in the  
10 early development of zebrafish median fin and pectoral structures. *PLoS One* **9**, e98505.
- 11           **Huang, C. C., Wang, T. C., Lin, B. H., Wang, Y. W., Johnson, S. L. and Yu, J.** (2009). Collagen IX  
12 is required for the integrity of collagen II fibrils and the regulation of vascular plexus formation in  
13 zebrafish caudal fins. *Dev Biol* **332**, 360-70.
- 14           **Hwang, W. Y., Fu, Y., Reyon, D., Maeder, M. L., Tsai, S. Q., Sander, J. D., Peterson, R. T.,  
15 Yeh, J. R. and Joung, J. K.** (2013). Efficient genome editing in zebrafish using a CRISPR-Cas system.  
16 *Nat Biotechnol* **31**, 227-9.
- 17           **Ianakev, P., Kilpatrick, M. W., Toudjarska, I., Basel, D., Beighton, P. and Tsipouras, P.**  
18 (2000). Split-hand/split-foot malformation is caused by mutations in the *p63* gene on 3q27. *Am J*  
19 *Hum Genet* **67**, 59-66.
- 20           **Inoue, D. and Wittbrodt, J.** (2011). One for all—a highly efficient and versatile method for  
21 fluorescent immunostaining in fish embryos. *PLoS One* **6**, e19713.
- 22           **Iovine, M. K.** (2007). Conserved mechanisms regulate outgrowth in zebrafish fins. *Nat Chem*  
23 *Biol* **3**, 613-8.
- 24           **Joao, L. E., Wente, S. R. and Chen, W.** (2013). Efficient multiplex biallelic zebrafish genome  
25 editing using a CRISPR nuclease system. *Proc Natl Acad Sci U S A* **110**, 13904-9.
- 26           **Jasuja, R., Voss, N., Ge, G., Hoffman, G. G., Lyman-Gingerich, J., Pelegri, F. and Greenspan,  
27 D. S.** (2006). *bmp1* and *mini fin* are functionally redundant in regulating formation of the zebrafish  
28 dorsoventral axis. *Mech Dev* **123**, 548-58.
- 29           **Kimmel, C. B., Ballard, W. W., Kimmel, S. R., Ullmann, B. and Schilling, T. F.** (1995). Stages of  
30 embryonic development of the zebrafish. *Dev Dyn* **203**, 253-310.
- 31           **Klopocki, E., Lohan, S., Doelken, S. C., Stricker, S., Ockeloen, C. W., Soares Thiele de Aguiar,  
32 R., Lezirovitz, K., Mingroni Netto, R. C., Jamsheer, A., Shah, H. et al.** (2012). Duplications of *BHLHA9*  
33 are associated with ectrodactyly and tibia hemimelia inherited in non-Mendelian fashion. *J Med*  
34 *Genet* **49**, 119-25.
- 35           **Kouwenhoven, E. N., van Heeringen, S. J., Tena, J. J., Oti, M., Dutilh, B. E., Alonso, M. E., de  
36 la Calle-Mustienes, E., Smeenk, L., Rinne, T., Parsaulian, L. et al.** (2010). Genome-wide profiling of  
37 *p63* DNA-binding sites identifies an element that regulates gene expression during limb development  
38 in the *7q21 SHFM1* locus. *Plos Genetics* **6**, e1001065.
- 39           **Lee, H. and Kimelman, D.** (2002). A dominant-negative form of *p63* is required for epidermal  
40 proliferation in zebrafish. *Dev Cell* **2**, 607-16.
- 41           **Lo Iacono, N., Mantero, S., Chiarelli, A., Garcia, E., Mills, A. A., Morasso, M. I., Costanzo, A.,  
42 Levi, G., Guerrini, L. and Merlo, G. R.** (2008). Regulation of *Dlx5* and *Dlx6* gene expression by *p63* is  
43 involved in EEC and SHFM congenital limb defects. *Development* **135**, 1377-88.
- 44           **Mari-Beffa, M., Carmona, M. C. and Becerra, J.** (1989). Elastoidin turn-over during tail fin  
45 regeneration in teleosts. A morphometric and radioautographic study. *Anat Embryol (Berl)* **180**, 465-  
46 70.
- 47           **Masselink, W., Cole, N. J., Fenyves, F., Berger, S., Sonntag, C., Wood, A., Nguyen, P. D.,  
48 Cohen, N., Knopf, F., Weidinger, G. et al.** (2016). A somitic contribution to the apical ectodermal  
49 ridge is essential for fin formation. *Nature* **535**, 542-6.
- 50           **Montes, G. S., Becerra, J., Toledo, O. M., Gordilho, M. A. and Junqueira, L. C.** (1982). Fine  
51 structure and histochemistry of the tail fin ray in teleosts. *Histochemistry* **75**, 363-76.

- 1           **Nagendran, M., Arora, P., Gori, P., Mulay, A., Ray, S., Jacob, T. and Sonawane, M.** (2015).  
2 Canonical Wnt signalling regulates epithelial patterning by modulating levels of laminins in zebrafish  
3 appendages. *Development* **142**, 2080.
- 4           **Obholz, K. L., Akopyan, A., Waymire, K. G. and MacGregor, G. R.** (2006). FNDC3A is required  
5 for adhesion between spermatids and Sertoli cells. *Dev Biol* **298**, 498-513.
- 6           **Parichy, D. M., Elizondo, M. R., Mills, M. G., Gordon, T. N. and Engeszer, R. E.** (2009).  
7 Normal table of postembryonic zebrafish development: staging by externally visible anatomy of the  
8 living fish. *Dev Dyn* **238**, 2975-3015.
- 9           **Pfefferli, C. and Jazwinska, A.** (2015). The art of fin regeneration in zebrafish. *Regeneration*  
10 (*Oxf*) **2**, 72-83.
- 11           **Restelli, M., Lopardo, T., Lo Iacono, N., Garaffo, G., Conte, D., Rustighi, A., Napoli, M., Del**  
12 **Sal, G., Perez-Morga, D., Costanzo, A. et al.** (2014). DLX5, FGF8 and the Pin1 isomerase control  
13 DeltaNp63alpha protein stability during limb development: a regulatory loop at the basis of the  
14 SHFM and EEC congenital malformations. *Hum Mol Genet* **23**, 3830-42.
- 15           **Ricard-Blum, S.** (2011). The collagen family. *Cold Spring Harb Perspect Biol* **3**, a004978.
- 16           **Santamaria, J. A. and Becerra, J.** (1991). Tail fin regeneration in teleosts: cell-extracellular  
17 matrix interaction in blastemal differentiation. *J Anat* **176**, 9-21.
- 18           **Singh, P., Carraher, C. and Schwarzbauer, J. E.** (2010). Assembly of fibronectin extracellular  
19 matrix. *Annu Rev Cell Dev Biol* **26**, 397-419.
- 20           **Sorrells, S., Toruno, C., Stewart, R. A. and Jette, C.** (2013). Analysis of apoptosis in zebrafish  
21 embryos by whole-mount immunofluorescence to detect activated Caspase 3. *J Vis Exp*, e51060.
- 22           **Stemmer, M., Thumberger, T., Del Sol Keyer, M., Wittbrodt, J. and Mateo, J. L.** (2015).  
23 CCTop: An Intuitive, Flexible and Reliable CRISPR/Cas9 Target Prediction Tool. *PLoS One* **10**,  
24 e0124633.
- 25           **Talbot, J. C., Walker, M. B., Carney, T. J., Huycke, T. R., Yan, Y. L., BreMiller, R. A., Gai, L.,**  
26 **Delaurier, A., Postlethwait, J. H., Hammerschmidt, M. et al.** (2012). *fras1* shapes endodermal pouch  
27 1 and stabilizes zebrafish pharyngeal skeletal development. *Development* **139**, 2804-13.
- 28           **Thisse, C. and Thisse, B.** (2008). High-resolution in situ hybridization to whole-mount  
29 zebrafish embryos. *Nat Protoc* **3**, 59-69.
- 30           **Towers, M. and Tickle, C.** (2009). Generation of pattern and form in the developing limb. *Int*  
31 *J Dev Biol* **53**, 805-12.
- 32           **van den Boogaart, J. G., Muller, M. and Osse, J. W.** (2012). Structure and function of the  
33 median finfold in larval teleosts. *J Exp Biol* **215**, 2359-68.
- 34           **van Eeden, F. J., Granato, M., Schach, U., Brand, M., Furutani-Seiki, M., Haffter, P.,**  
35 **Hammerschmidt, M., Heisenberg, C. P., Jiang, Y. J., Kane, D. A. et al.** (1996). Genetic analysis of fin  
36 formation in the zebrafish, *Danio rerio*. *Development* **123**, 255-62.
- 37           **Wada, N.** (2011). Spatiotemporal changes in cell adhesiveness during vertebrate limb  
38 morphogenesis. *Dev Dyn* **240**, 969-78.
- 39           **Walker, M. B. and Kimmel, C. B.** (2007). A two-color acid-free cartilage and bone stain for  
40 zebrafish larvae. *Biotech Histochem* **82**, 23-8.
- 41           **Webb, A. E., Sanderford, J., Frank, D., Talbot, W. S., Driever, W. and Kimmel, D.** (2007).  
42 Laminin alpha5 is essential for the formation of the zebrafish fins. *Dev Biol* **311**, 369-82.
- 43           **Wehner, D., Cizelsky, W., Vasudevaro, M. D., Ozhan, G., Haase, C., Kagermeier-Schenk, B.,**  
44 **Roder, A., Dorsky, R. I., Moro, E., Argenton, F. et al.** (2014). Wnt/beta-catenin signaling defines  
45 organizing centers that orchestrate growth and differentiation of the regenerating zebrafish caudal  
46 fin. *Cell Rep* **6**, 467-81.
- 47           **Wehner, D. and Weidinger, G.** (2015). Signaling networks organizing regenerative growth of  
48 the zebrafish fin. *Trends Genet* **31**, 336-43.
- 49           **Westerfield, M.** (2000). The zebrafish book. A guide for the laboratory use of zebrafish  
50 (*Danio rerio*): Univ. of Oregon Press.
- 51           **Wilkinson, R. N., Elworthy, S., Ingham, P. W. and van Eeden, F. J.** (2013). A method for high-  
52 throughput PCR-based genotyping of larval zebrafish tail biopsies. *Biotechniques* **55**, 314-6.

- 1           **Yano, T., Abe, G., Yokoyama, H., Kawakami, K. and Tamura, K.** (2012). Mechanism of  
2 pectoral fin outgrowth in zebrafish development. *Development* **139**, 2916-25.
- 3           **Yano, T. and Tamura, K.** (2013). The making of differences between fins and limbs. *J Anat*  
4 **222**, 100-13.
- 5           **Zhang, H. Y., Lardelli, M. and Ekblom, P.** (1997). Sequence of zebrafish fibulin-1 and its  
6 expression in developing heart and other embryonic organs. *Dev Genes Evol* **207**, 340-351.
- 7           **Zhang, J., Wagh, P., Guay, D., Sanchez-Pulido, L., Padhi, B. K., Korzh, V., Andrade-Navarro,**  
8 **M. A. and Akimenko, M. A.** (2010). Loss of fish actinotrichia proteins and the fin-to-limb transition.  
9 *Nature* **466**, 234-7.
- 10          **Zhu, J. and Clark, R. A.** (2014). Fibronectin at select sites binds multiple growth factors and  
11 enhances their activity: expansion of the collaborative ECM-GF paradigm. *J Invest Dermatol* **134**, 895-  
12 901.

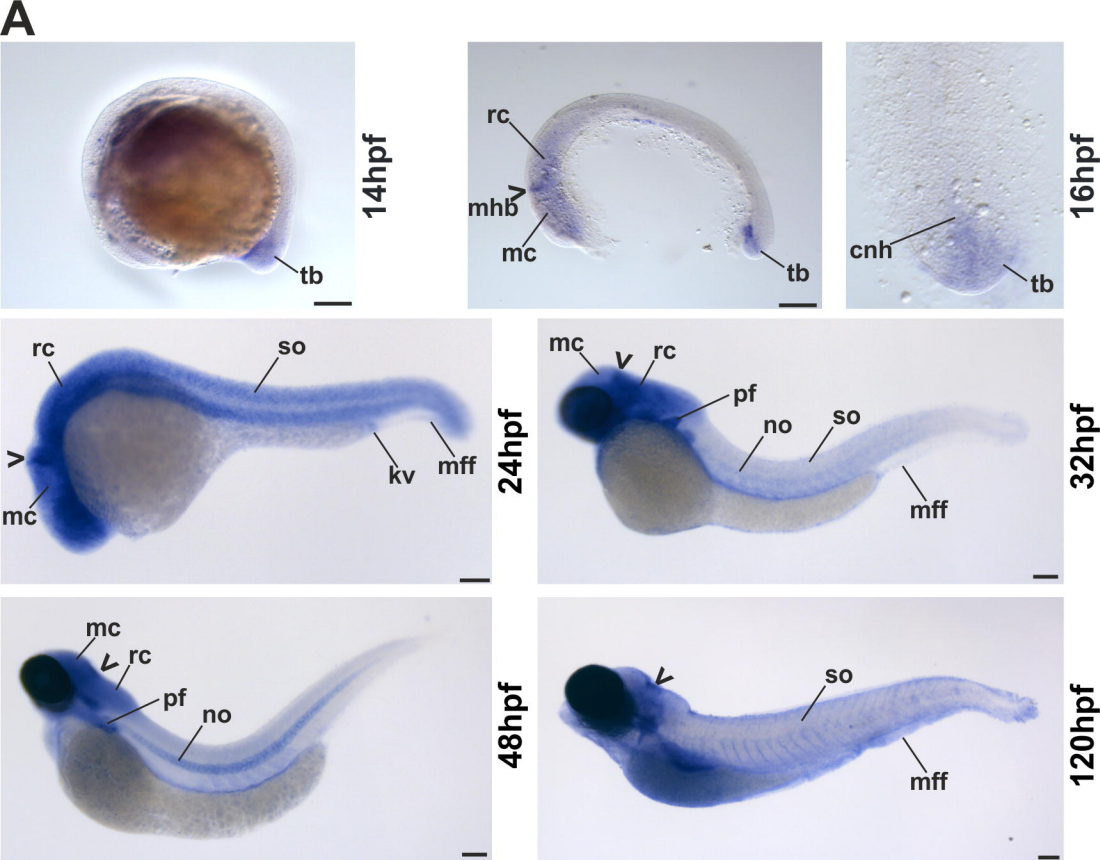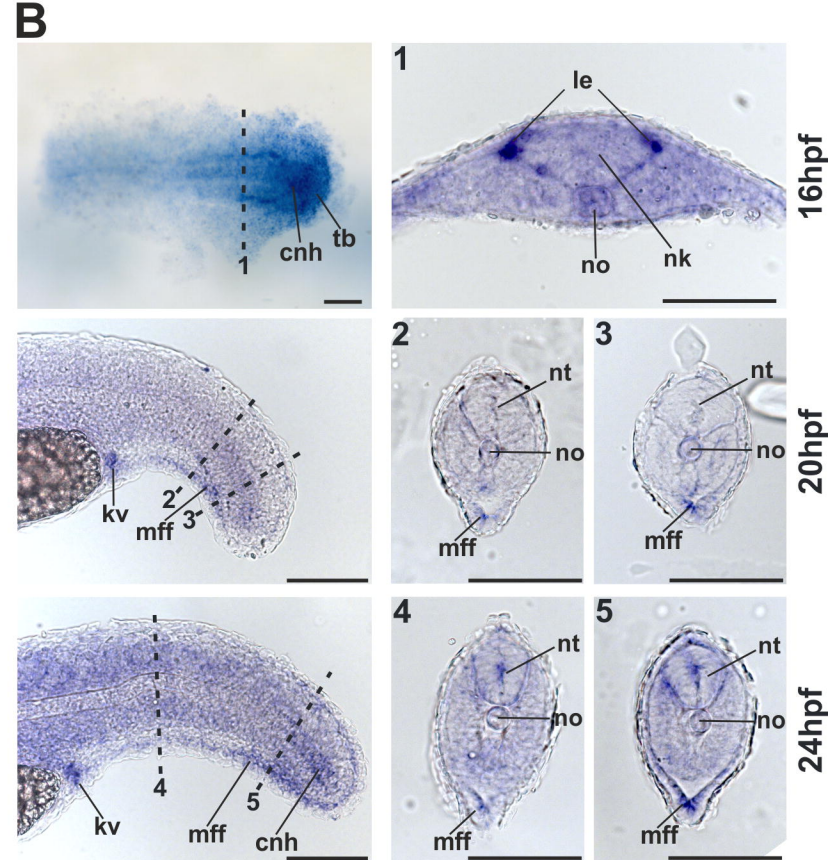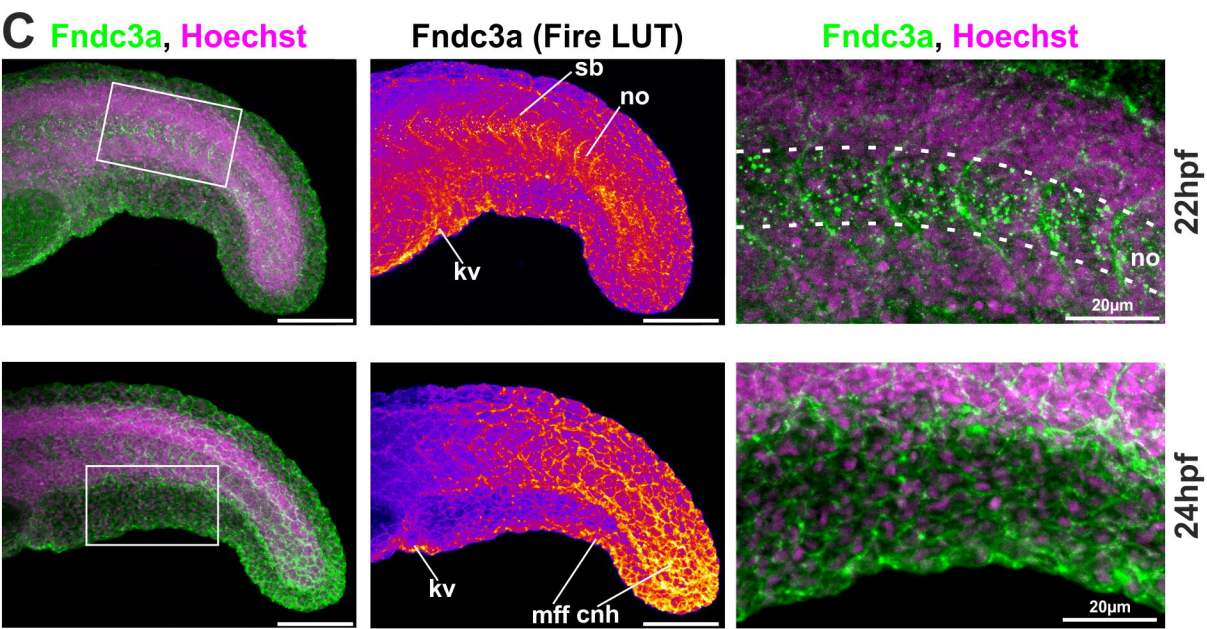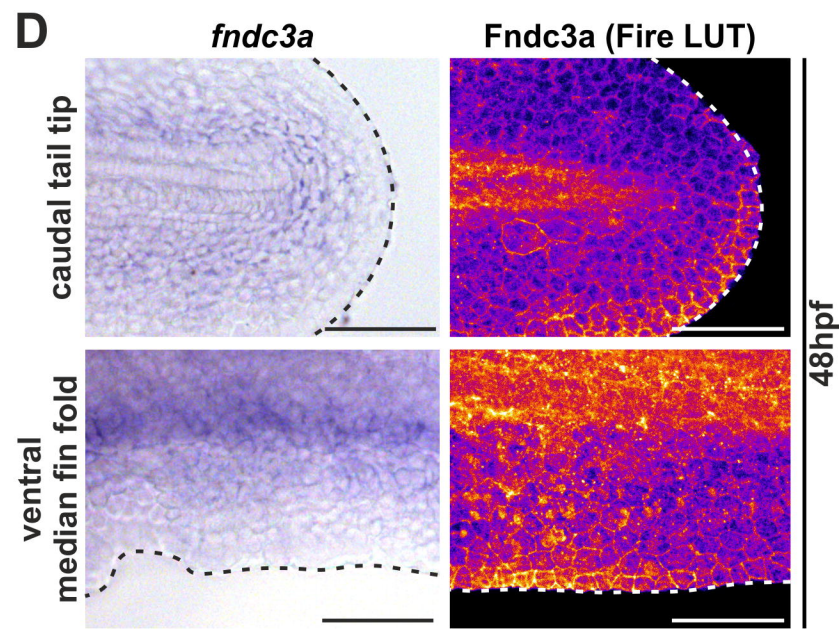

**A**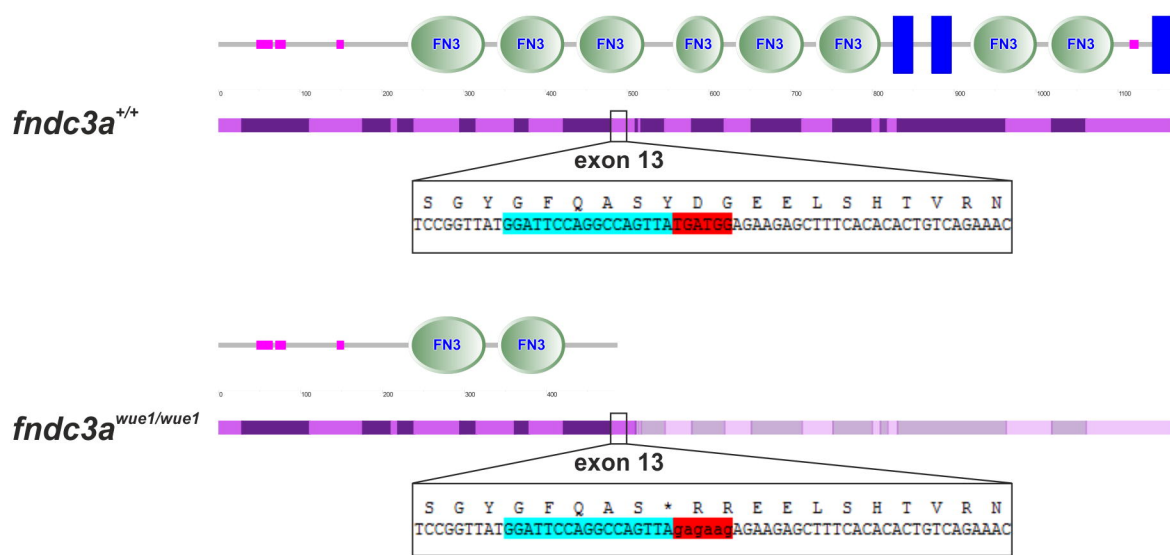**B**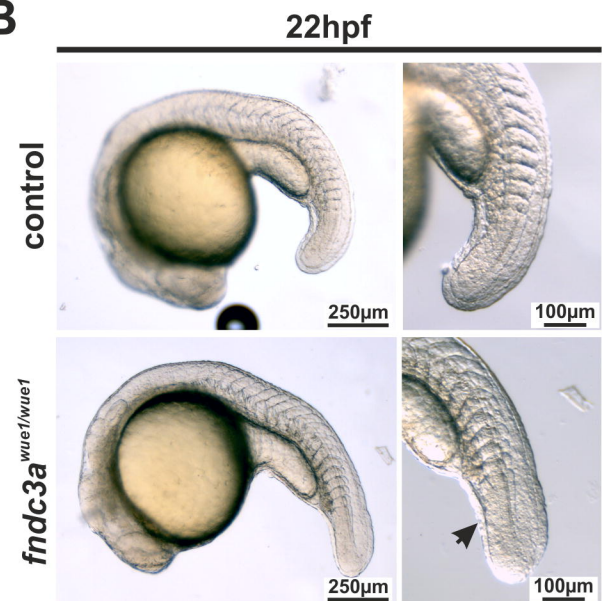**C**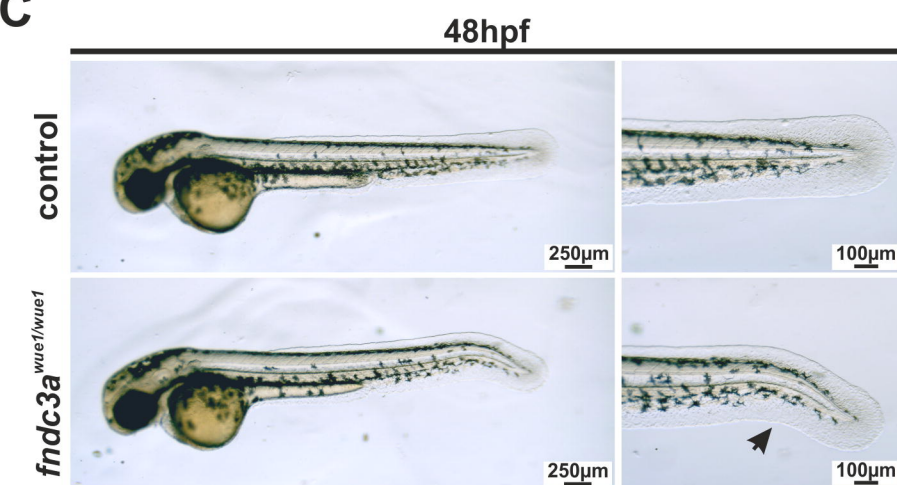**D**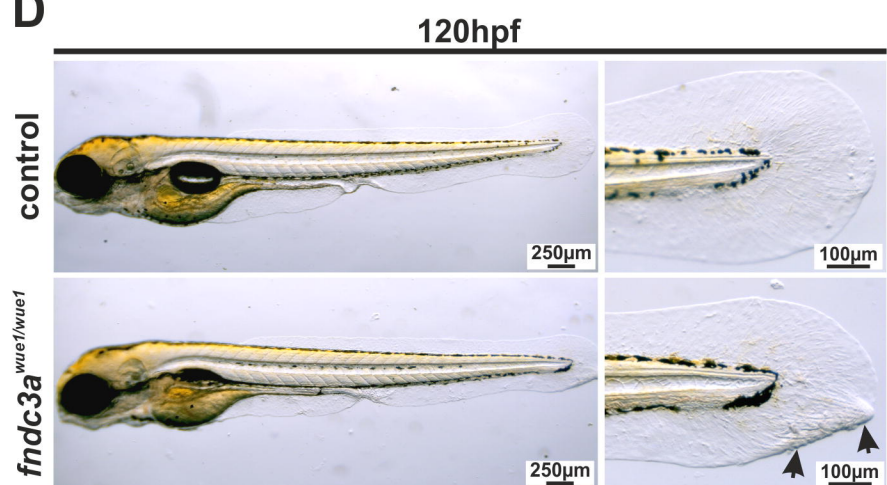**E**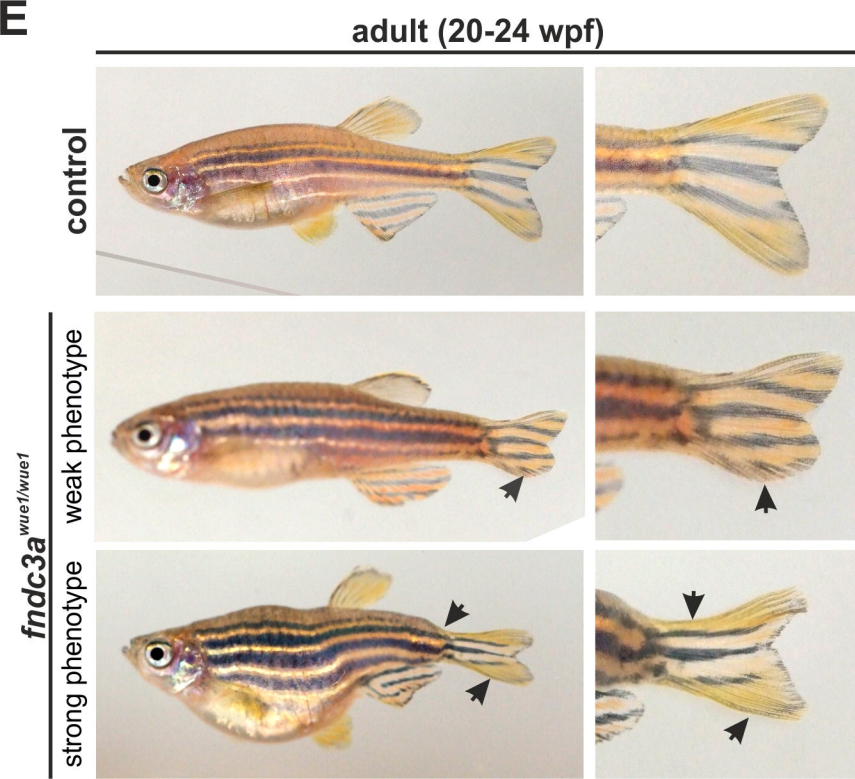**F**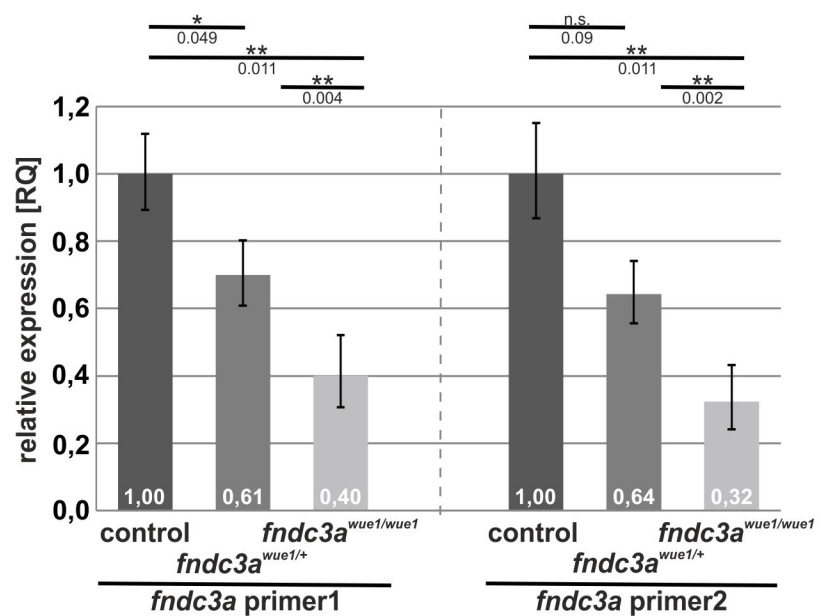

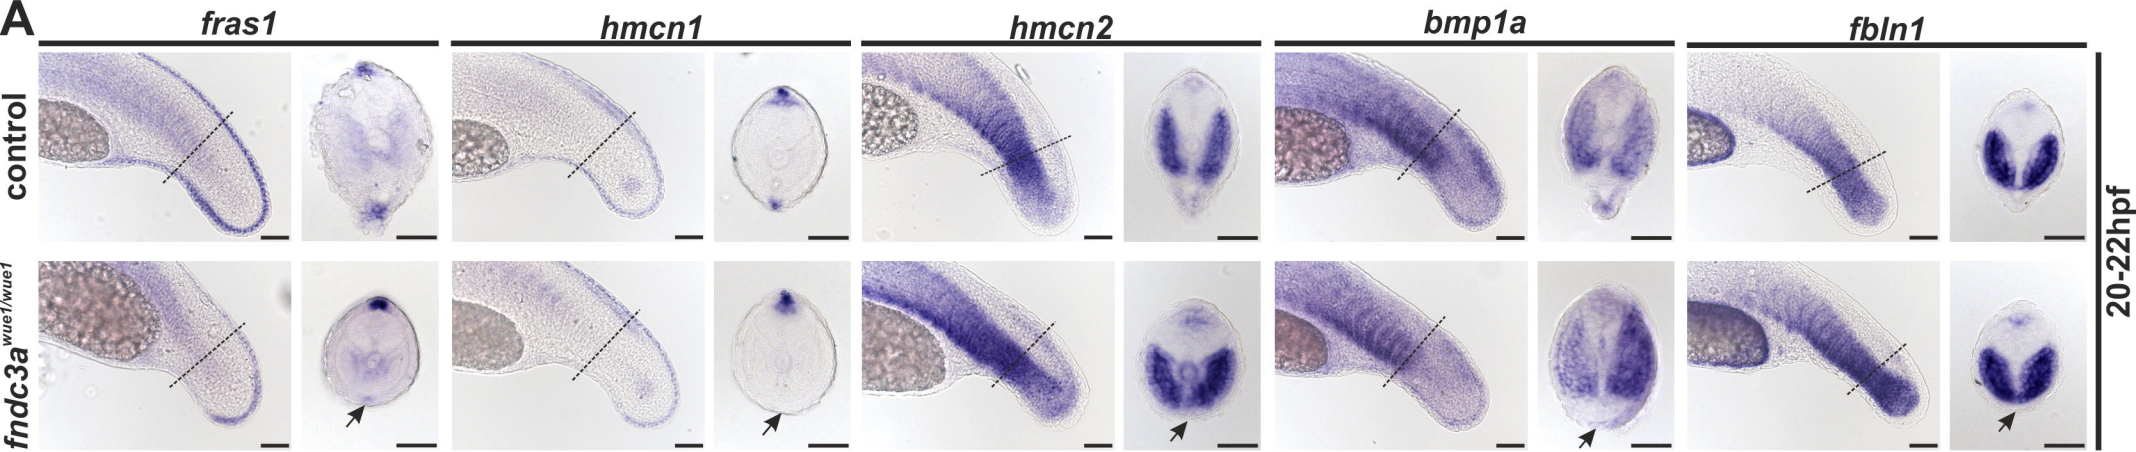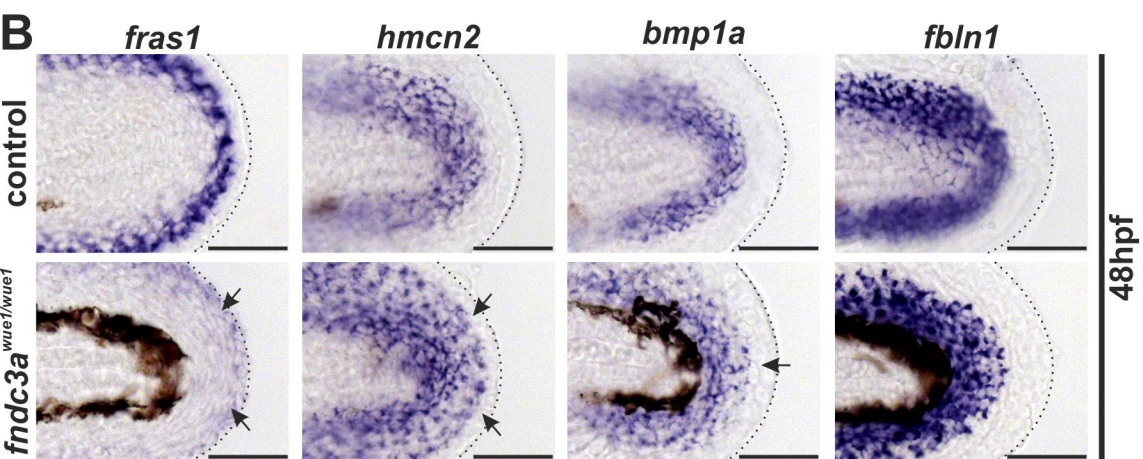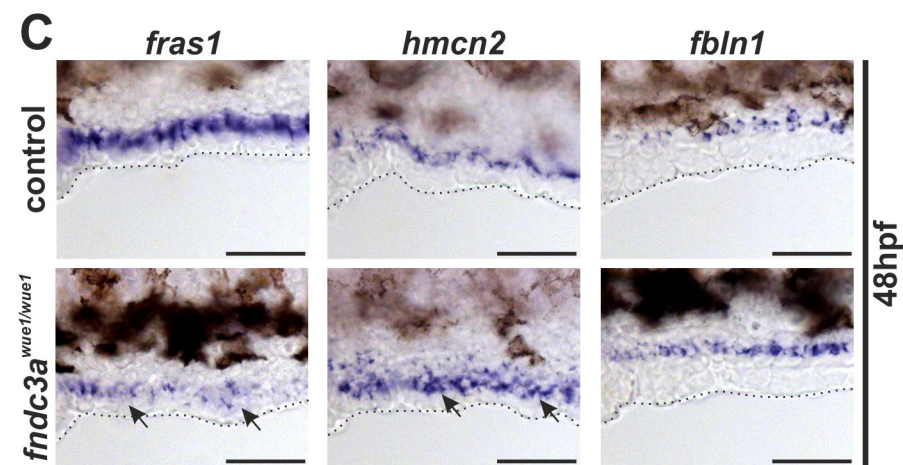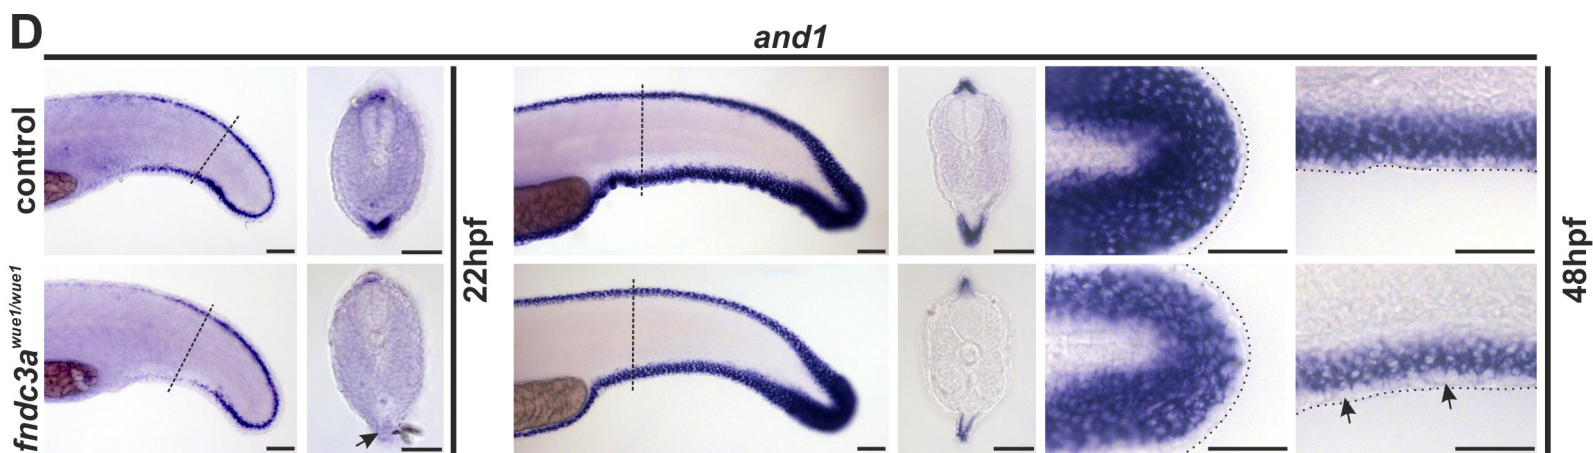



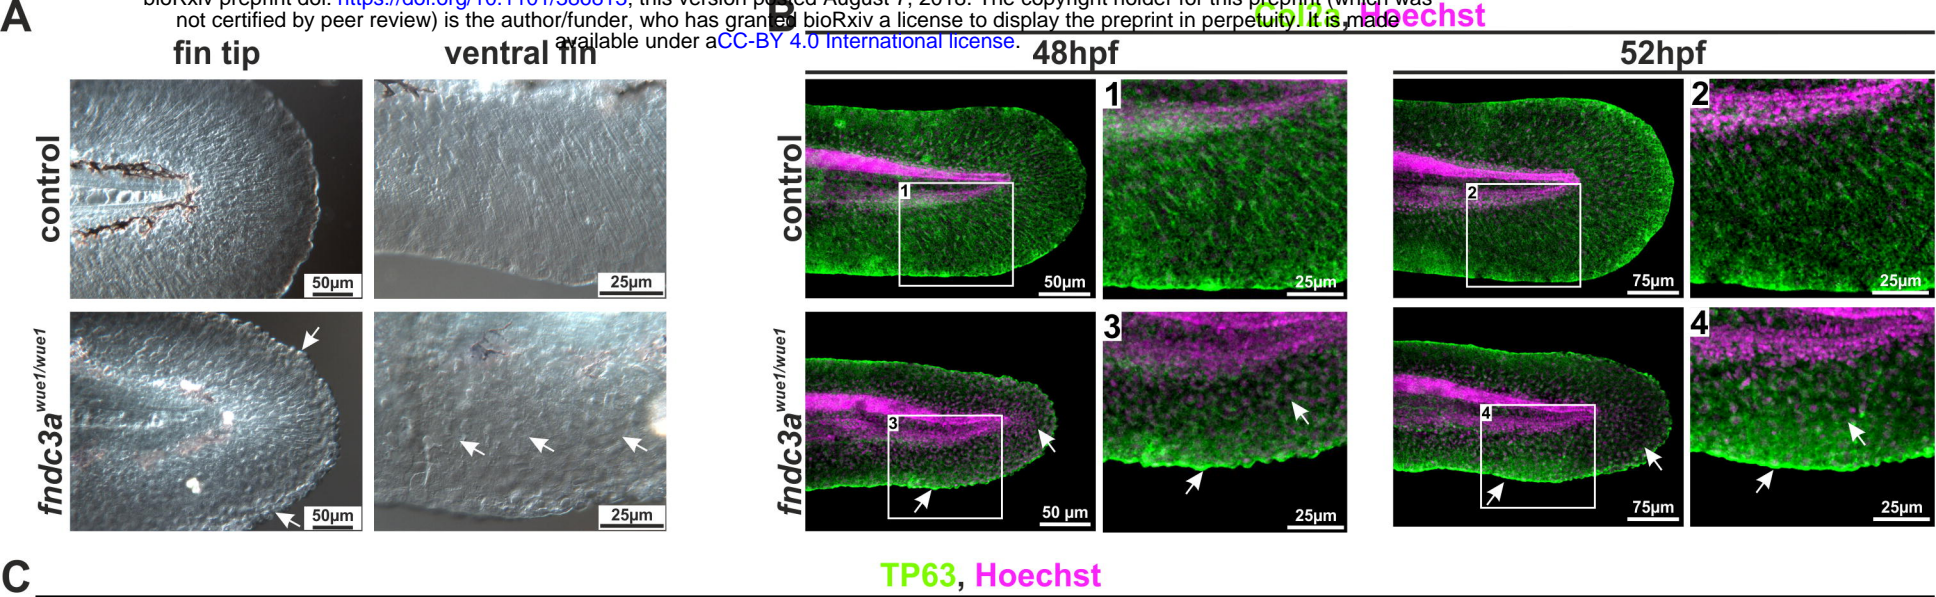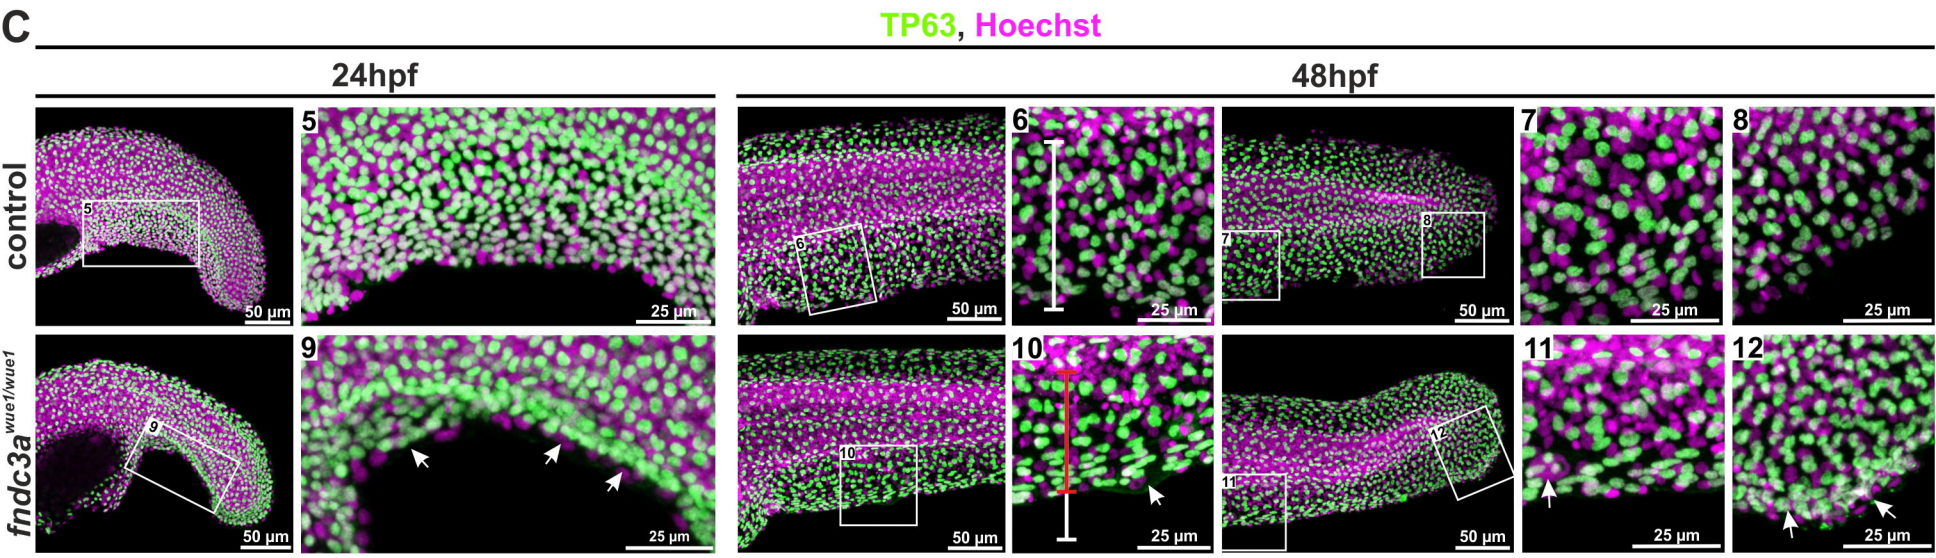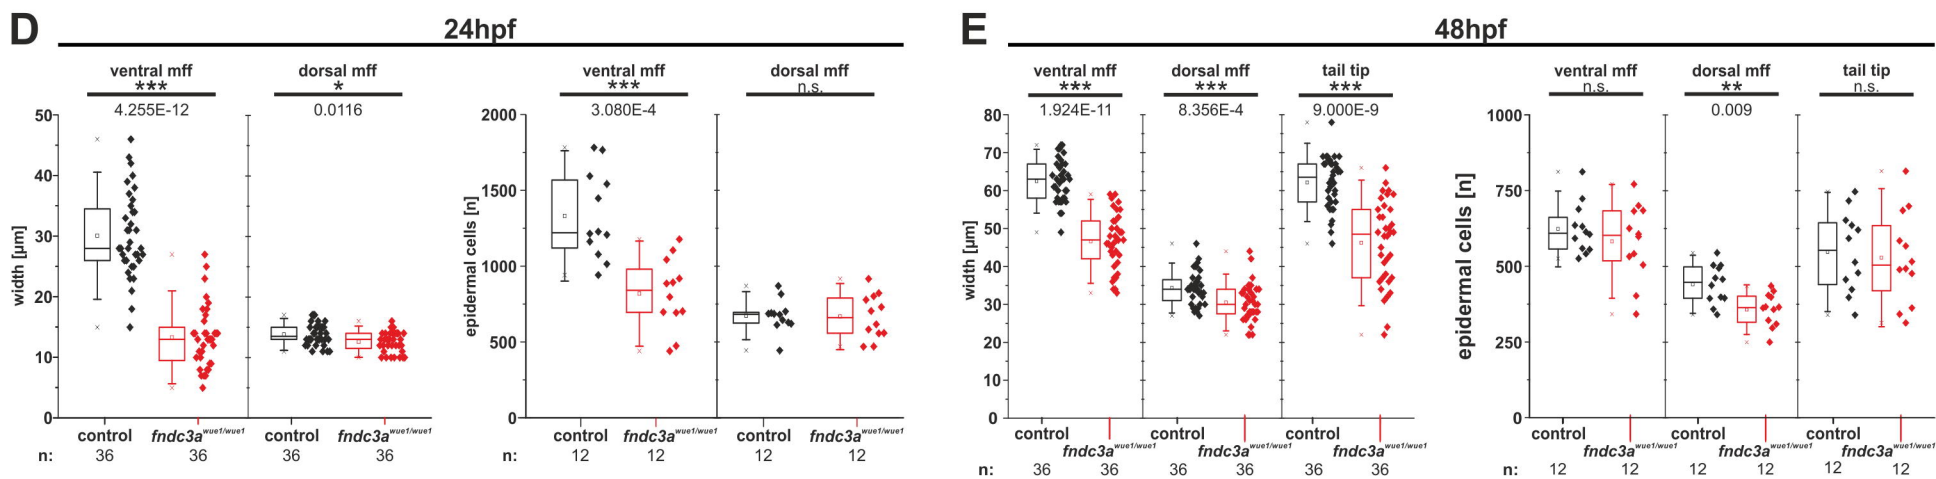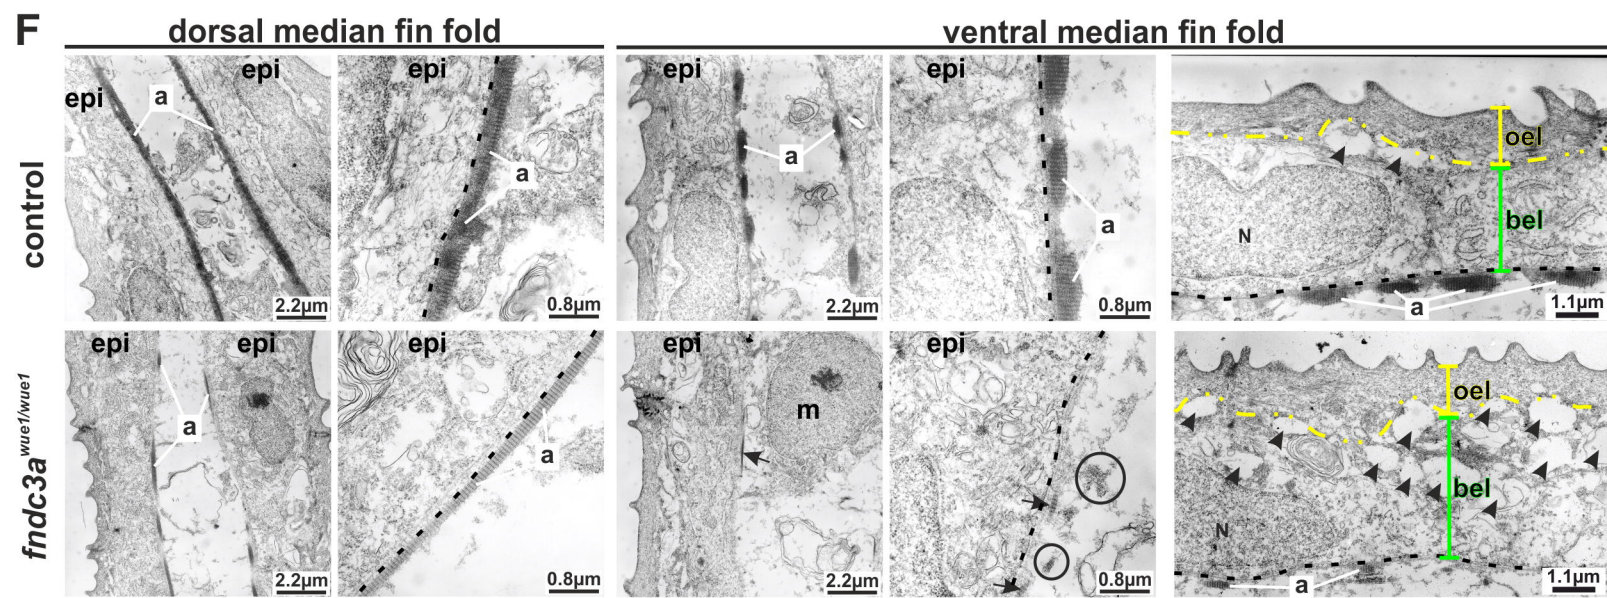

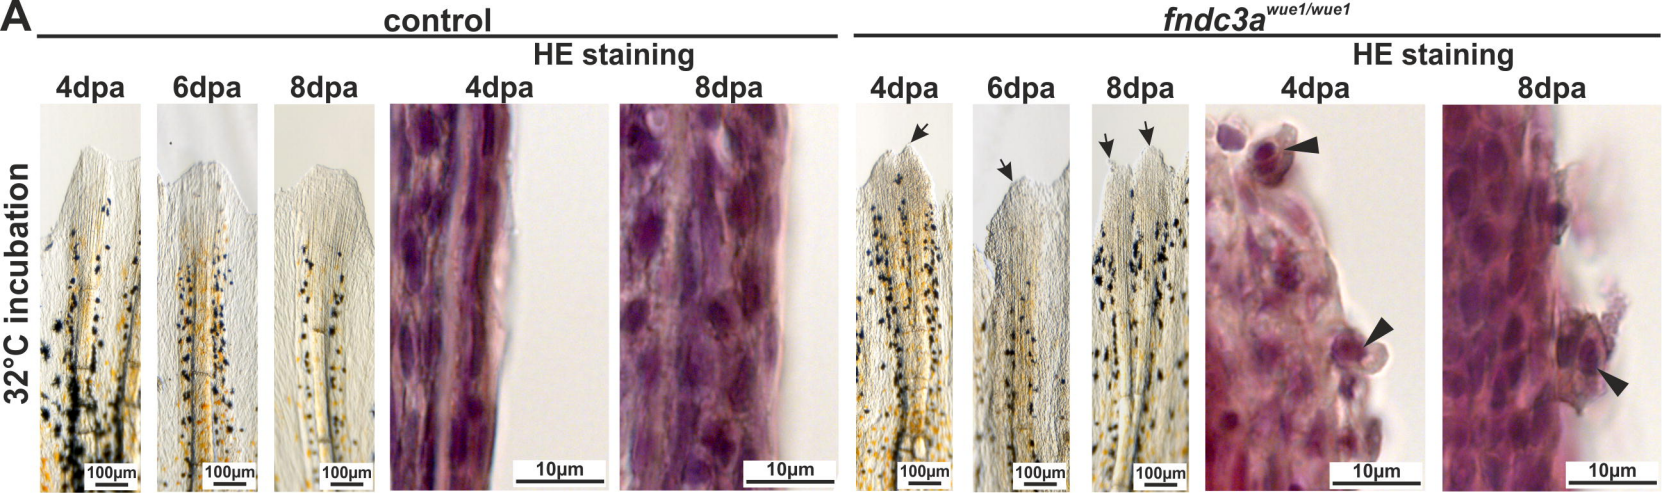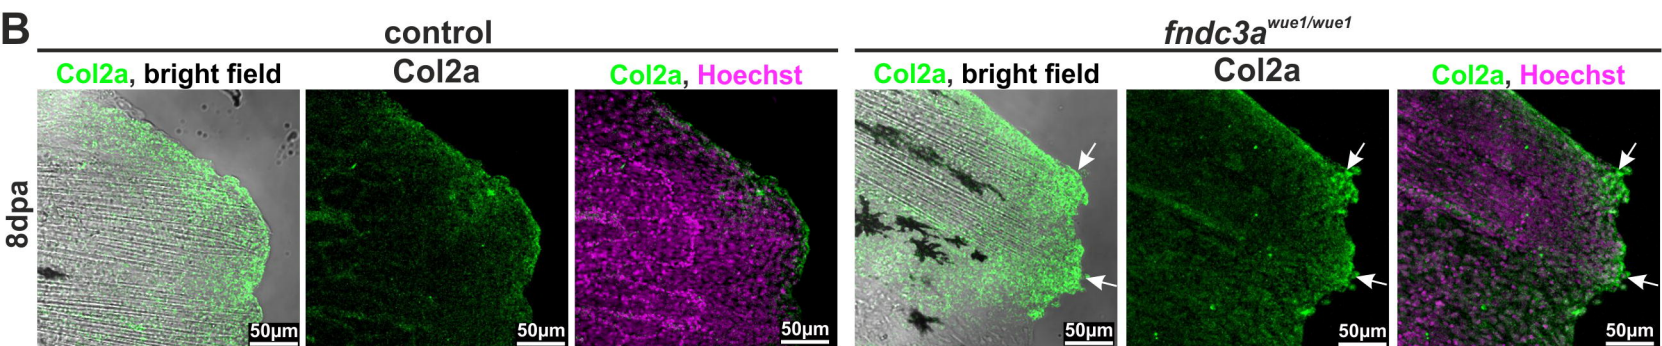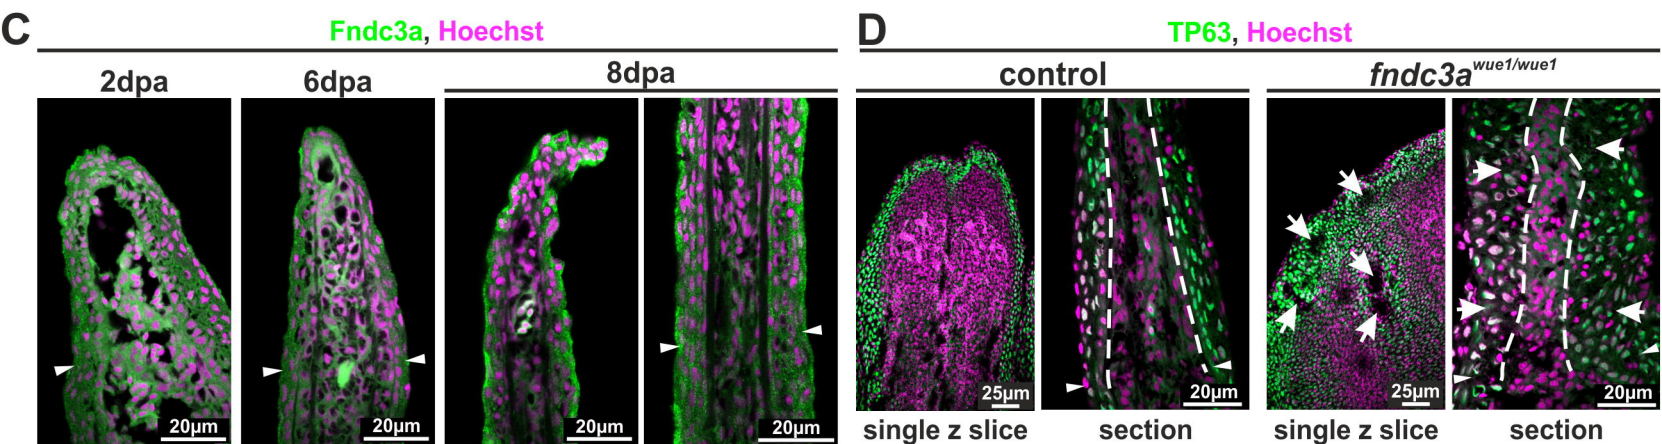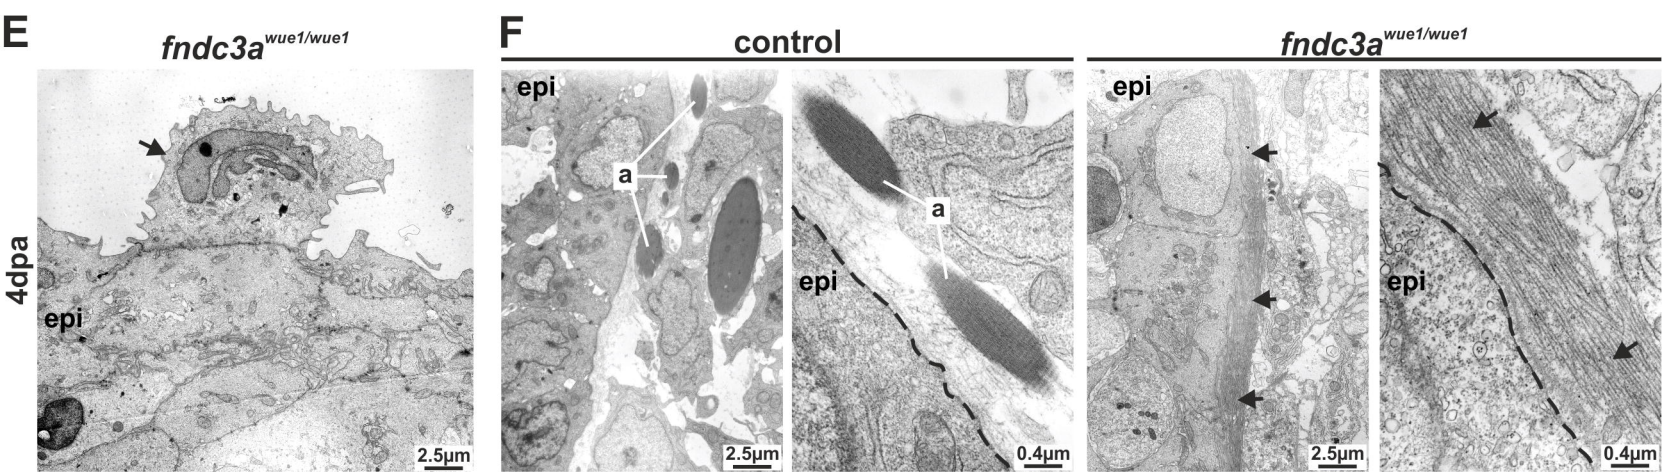

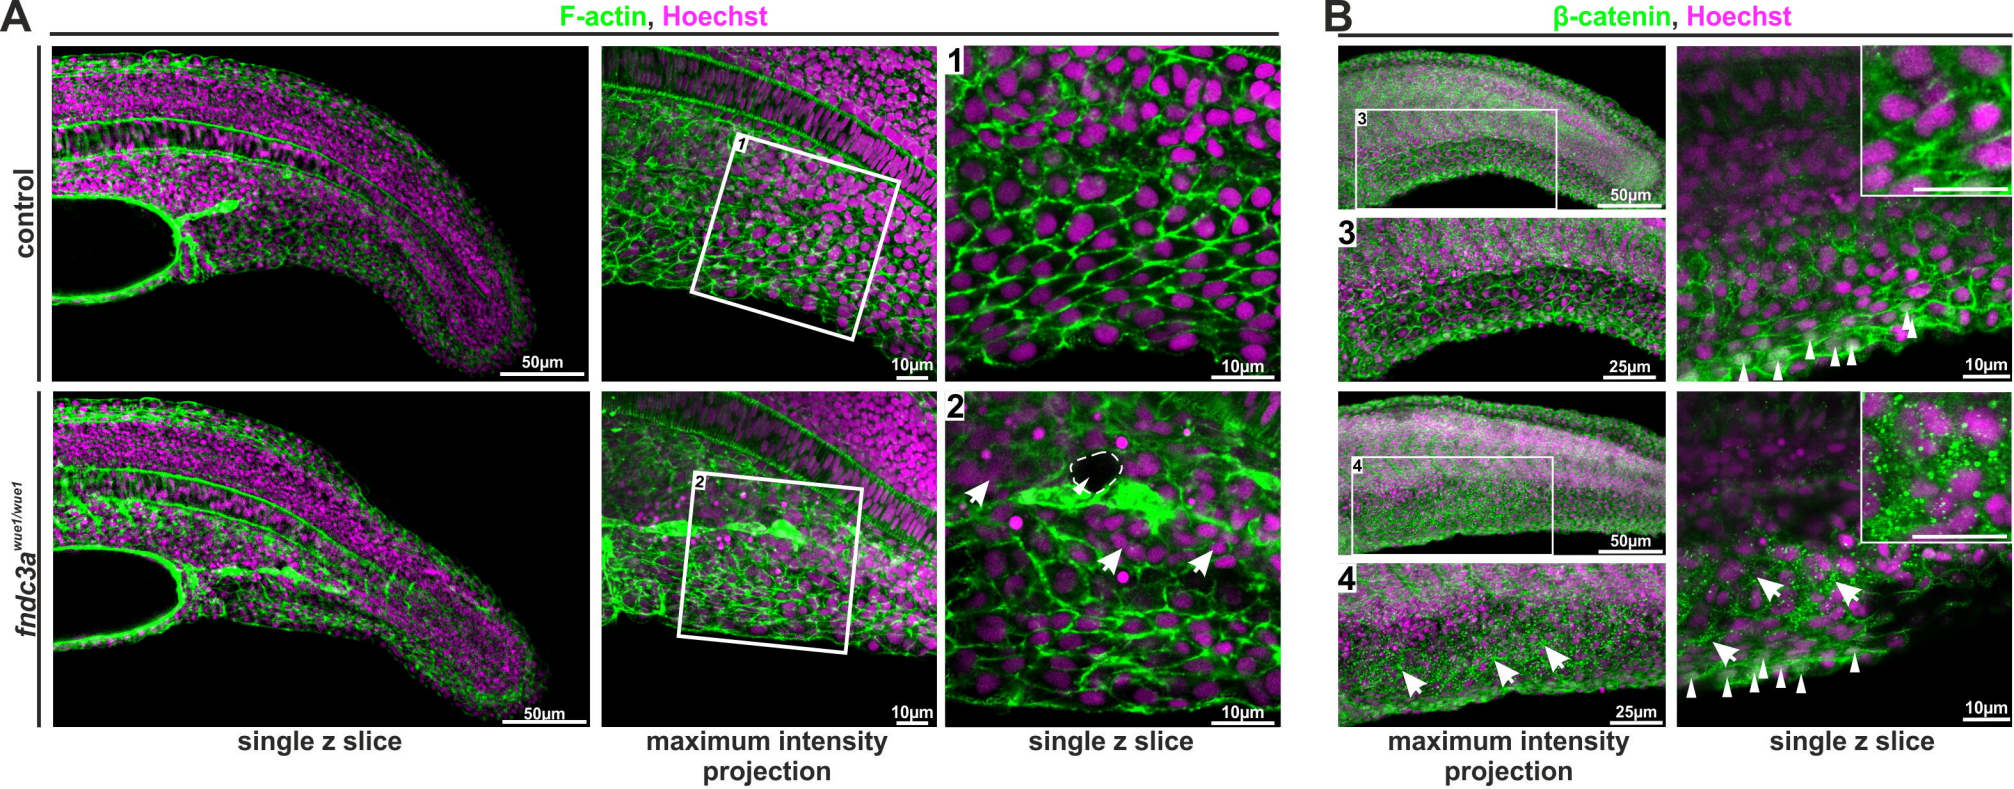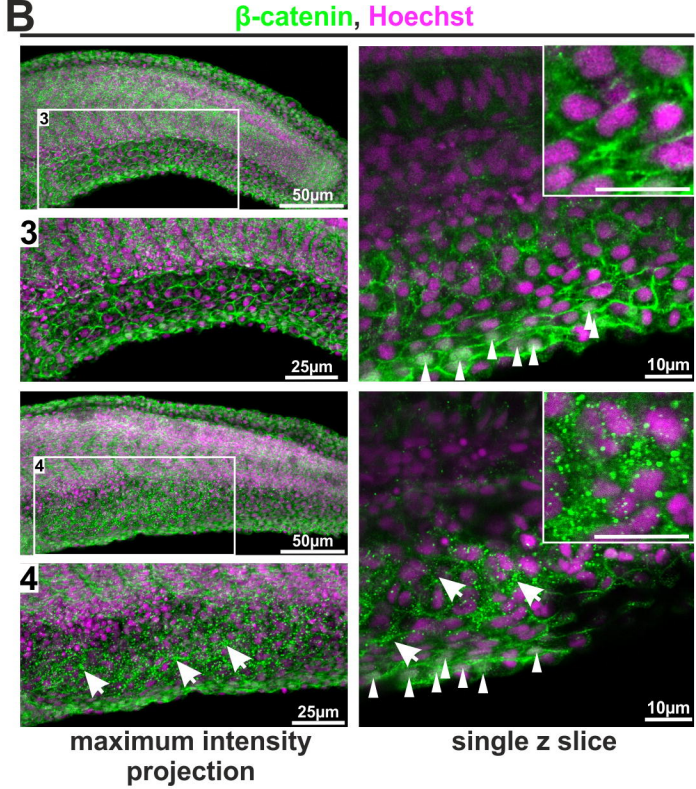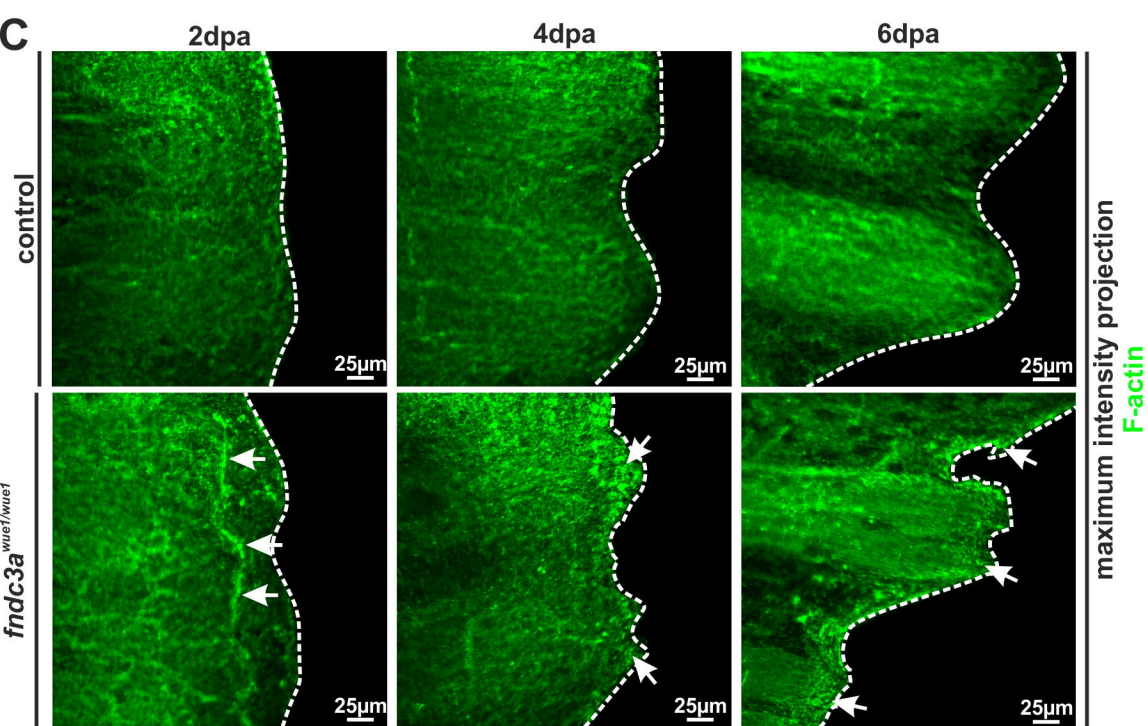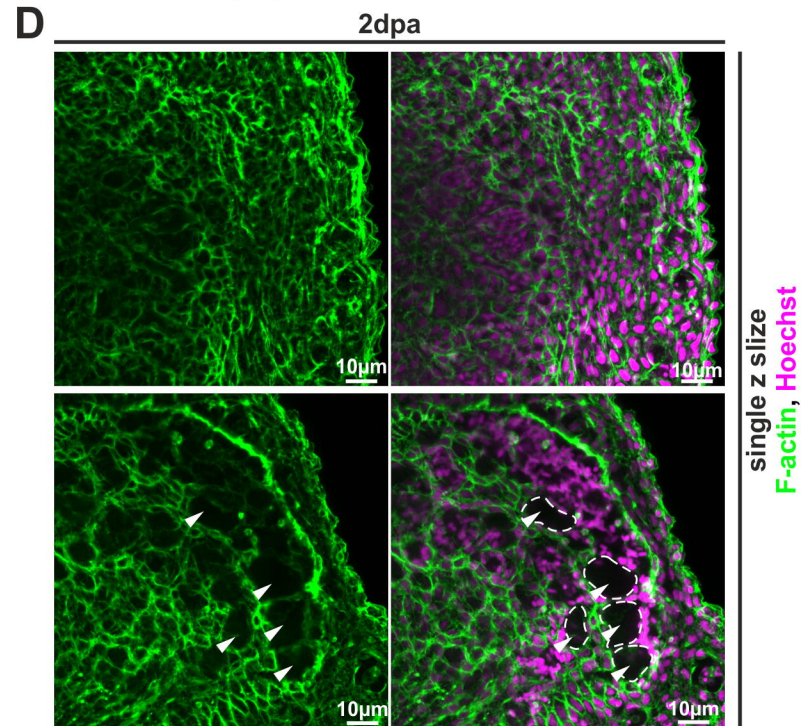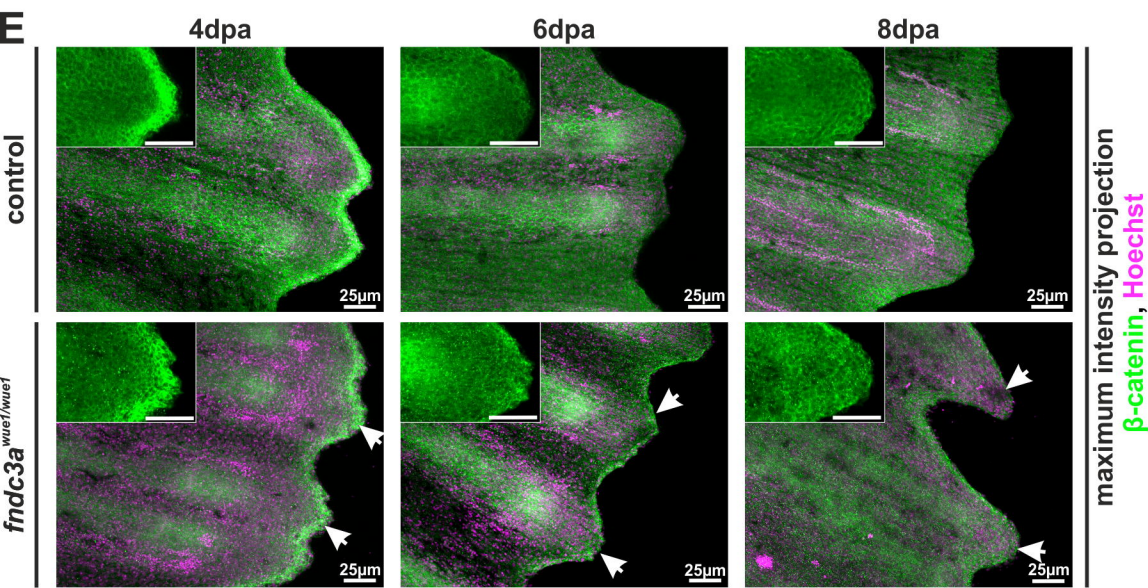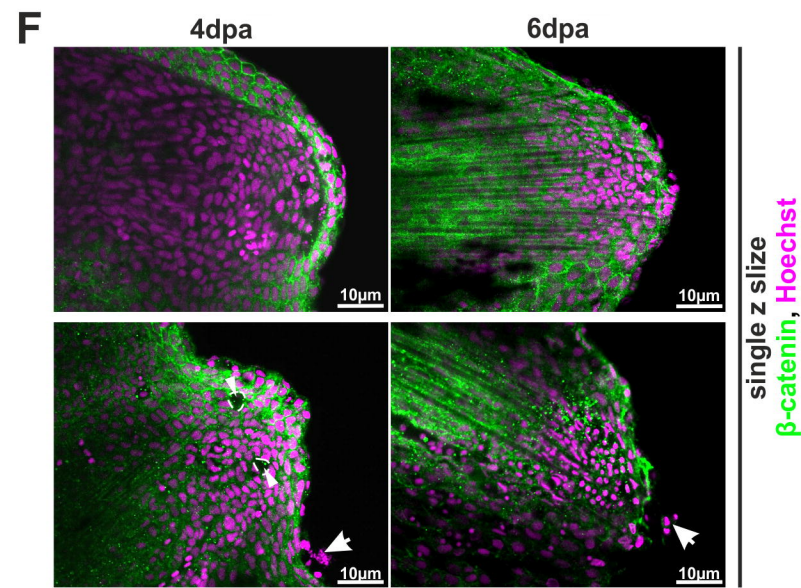

## Development

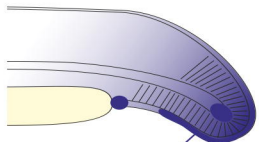

*fndc3a*

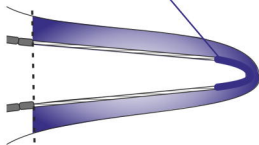

## Regeneration

Reduced *Fndc3a* function

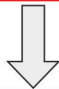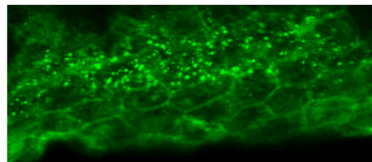

Reduced ECM structure  
in epidermal cells

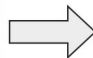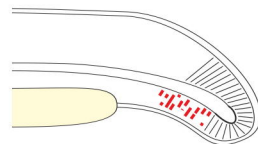

Impaired collagen  
assembly

Actinotrichia breakdown

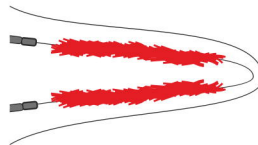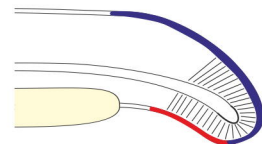

Loss of ventral  
median fin fold cells

Detached  
epidermal cells

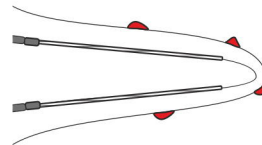

Source: https://www.biorxiv.org/content/10.1101/386813v1.full.pdf
